# Supplementary material for: A comparative study of titanium complexes bearing 2-(arylideneamino)phenolates and 2-((arylimino)methyl)phenolates as catalysts for ring-opening polymerization of ε-caprolactone and l-lactide
Source: Royal Society of Chemistry journal article supplement (doi:10.1039/d4dt02282c), 2024-01-01
Supplement: d4dt02282c1.pdf [file d4dt02282c1.pdf]

## Comparative Study of Titanium Complexes Bearing 2-(Arylideneamino)phenolates and 2-((Arylimino)methyl)phenolates as Catalysts for Ring-Opening Polymerization of $\epsilon$ -Caprolactone and L-Lactide

Ling-Jo Wu,<sup>a†</sup> Ravi Kumar Kottalanka,<sup>b</sup> Yu-Ting Chu,<sup>ac‡</sup> Zheng-Ian Lin,<sup>d</sup> Chun-Juei Chang,<sup>a</sup> Shangwu Ding,<sup>ac</sup> Hsuan-Ying Chen,<sup>\*acde</sup> Kuo-Hui Wu,<sup>\*g</sup> Chih-Kuang Chen<sup>\*d</sup>

<sup>a</sup> Department of Medicinal and Applied Chemistry, Drug Development and Value Creation Research Center, Kaohsiung Medical University, Kaohsiung, Taiwan, 80708, R.O.C.

<sup>b</sup> Department of Chemistry, School of Applied Science and Humanities, Vignan's Foundation for Science Technology and Research, Vadlamudi, Guntur, Andhra Pradesh 522213, India.

<sup>c</sup> Department of Chemistry, National Sun Yat-Sen University, Kaohsiung, Taiwan, 80424, R.O.C.

<sup>d</sup> Polymeric Biomaterials Laboratory, Department of Materials and Optoelectronic Science, National Sun Yat-Sen University, Kaohsiung 80424, Taiwan

<sup>e</sup> Department of Medical Research, Kaohsiung Medical University Hospital, Kaohsiung 80708, Taiwan, R.O.C.

<sup>f</sup> National Pingtung University of Science and Technology, Pingtung 91201, Taiwan

<sup>g</sup> Department of Chemistry, National Central University, Taoyuan, Taiwan, 32001, R.O.C.

### Supporting Information

#### Table of Contents

|                                                                                                                                                                                               |    |
|-----------------------------------------------------------------------------------------------------------------------------------------------------------------------------------------------|----|
| <b>Table S1.</b> Selected bond lengths (Å) and bond angles (deg) of <b>F<sup>H</sup>-Ti</b> , <b>S<sup>H</sup>-Ti</b> , and <b>F<sup>OMe</sup>-Ti</b> .....                                   | 2  |
| <b>Table S2.</b> Kinetic study of CL polymerization with various five-membered ring Ti complexes .....                                                                                        | 4  |
| <b>Table S3.</b> Kinetic study of CL polymerization with various six-membered ring Ti complexes .....                                                                                         | 5  |
| <b>Table S4.</b> Kinetic study of CL polymerization with various concentration of <b>F<sup>Cl</sup>-Ti</b> in toluene 5 mL, [CL] = 2.0 M at 60°C .....                                        | 7  |
| <b>Table S5.</b> Kinetic study of LA polymerization with various five membered ring Ti complexes .....                                                                                        | 9  |
| <b>Table S6.</b> Kinetic study of LA polymerization with various six-membered ring Ti complexes.....                                                                                          | 11 |
| <b>Table S7.</b> Kinetic study of LA polymerization with <b>F<sup>H</sup>-Ti</b> <sup>a</sup> in various concentrations.....                                                                  | 13 |
| <b>Table S8.</b> Measuring polymer's molar masses at different times/conversions for CL polymerization using <b>F<sup>Cl</sup>-Ti</b> as a catalyst.....                                      | 15 |
| <b>Table S9.</b> Measuring polymer's molar masses at different times/conversions for LA polymerization using <b>F<sup>H</sup>-Ti</b> as a catalyst.....                                       | 15 |
| <b>Figure S1.</b> First-order kinetic plots of CL polymerization with various five membered ring Ti complexes plotted against time with [CL] = 2.0 M in toluene 5 mL ( <b>Table S3</b> )..... | 5  |
| <b>Figure S2.</b> First-order kinetic plots of CL polymerization with various six membered ring Ti complexes plotted against time with [CL] = 2.0 M in toluene 5 mL .....                     | 6  |
| <b>Figure S3.</b> First-order kinetic plots of CL polymerization by various five and six membered ring Ti complexes plotted against time with [CL] = 2.0 M in toluene 5 mL. ....              | 7  |
| <b>Figure S4.</b> First-order kinetic plots of CL polymerization with various concentrations of [ <b>F<sup>Cl</sup>-Ti</b> ] plotted                                                          |    |

|                                                                                                                                                                                                  |       |
|--------------------------------------------------------------------------------------------------------------------------------------------------------------------------------------------------|-------|
| against time with [CL] = 2.0 M in toluene 5 mL .....                                                                                                                                             | 8     |
| <b>Figure S5.</b> First-order kinetic plots of LA polymerization by various five membered ring Ti complexes plotted against time with [LA] = 0.5 M in toluene 5 mL ( <b>Table S1</b> ) .....     | 10    |
| <b>Figure S6.</b> First-order kinetic plots of LA polymerization by various six membered ring Ti complexes plotted against time with [LA] = 0.5 M in toluene 5 mL ( <b>Table S2</b> ) .....      | 12    |
| <b>Figure S7.</b> First-order kinetic plots of LA polymerization by various five- and six-membered ring Ti complexes plotted against time with [LA] = 0.5 M in toluene 5 mL .....                | 13    |
| <b>Figure S8.</b> First-order kinetic plots of LA polymerization with various concentrations of [ <b>F<sup>H</sup>-Ti</b> ] plotted against time with [LA] = 0.5 M in toluene 5 mL .....         | 14    |
| <b>Figure S9-S22.</b> <sup>1</sup> H and <sup>13</sup> C NMR spectrum of Ti complexes in CDCl <sub>3</sub> .....                                                                                 | 16-22 |
| <b>Figure S23.</b> <sup>1</sup> H NMR spectrum of PCL in CDCl <sub>3</sub> .....                                                                                                                 | 23    |
| <b>Figure S24.</b> ESI-MS spectra of PCL synthesized by using <b>F<sup>Cl</sup>-Ti</b> .....                                                                                                     | 23    |
| <b>Figure S25.</b> <sup>1</sup> H NMR spectrum of PLA in CDCl <sub>3</sub> .....                                                                                                                 | 24    |
| <b>Figure S26.</b> ESI-MS spectra of PCL synthesized by using <b>F<sup>H</sup>-Ti</b> .....                                                                                                      | 24    |
| <b>Figure S27.</b> <sup>13</sup> C NMR of copolymer PLA- <i>grad</i> -PCL (entry 4 of <b>Table 4</b> ) by <b>F<sup>OMe</sup>-Ti</b> .....                                                        | 25    |
| <b>Figure S28.</b> <sup>13</sup> C NMR of copolymer PLA- <i>grad</i> -PCL polymerized by <b>F<sup>OMe</sup>-Ti</b> (A) and <b>S<sup>OMe</sup>-Ti</b> (B)....                                     | 25    |
| <b>Figure S29-S59.</b> GPC spectrum of PCL and PLA ( <b>Table 1-3, S8-S9</b> ).....                                                                                                              | 26-36 |
| <b>Figure S60.</b> MALDI-TOF spectra of PLA- <i>grad</i> -PCL copolymerization (50 CL + 50 LA) using <b>F<sup>OMe</sup>-Ti</b> as a catalyst; PLA conversion = 19% and PCL conversion = 2%.....  | 36    |
| <b>Figure S61.</b> MALDI-TOF spectra of PLA- <i>grad</i> -PCL copolymerization (50 CL + 50 LA) using <b>F<sup>OMe</sup>-Ti</b> as a catalyst; PLA conversion = 37% and PCL conversion = 10%..... | 37    |
| <b>Figure S62.</b> DSC curve of PLA (entry 3 of <b>Table 3</b> ).....                                                                                                                            | 37    |
| <b>Figure S63.</b> DSC curve of PCL (entry 3 of <b>Table 2</b> ).....                                                                                                                            | 38    |
| <b>Figure S62.</b> DSC curve of PLA- <i>grad</i> -PCL (entry 8 of <b>Table 4</b> ).....                                                                                                          | 39    |

**Table S1.** Crystallographic parameters of **F<sup>H</sup>-Ti**, **S<sup>H</sup>-Ti**, and **F<sup>OMe</sup>-Ti**.

| CCDC number         | <b>F<sup>H</sup>-Ti</b><br>2264712                                            | <b>F<sup>OMe</sup>-Ti</b><br>2264713                                                        |
|---------------------|-------------------------------------------------------------------------------|---------------------------------------------------------------------------------------------|
| Identification code | K11004-HYC-D                                                                  | K11007-HYC-L                                                                                |
| Empirical formula   | C <sub>64</sub> H <sub>68</sub> N <sub>4</sub> O <sub>8</sub> Ti <sub>2</sub> | C <sub>9.71</sub> H <sub>10.86</sub> N <sub>0.57</sub> O <sub>1.71</sub> Ti <sub>0.29</sub> |
| Formula weight      | 1117.02                                                                       | 176.73                                                                                      |
| Temperature/K       | 113(2)                                                                        | 113(2)                                                                                      |
| Crystal system      | monoclinic                                                                    | monoclinic                                                                                  |
| Space group         | P2 <sub>1</sub> /c                                                            | P2 <sub>1</sub> /c                                                                          |

|                                             |                                                               |                                                               |
|---------------------------------------------|---------------------------------------------------------------|---------------------------------------------------------------|
| a/Å                                         | 12.1742(3)                                                    | 11.8926(2)                                                    |
| b/Å                                         | 16.9814(4)                                                    | 14.8890(3)                                                    |
| c/Å                                         | 27.9303(5)                                                    | 18.5751(3)                                                    |
| $\alpha$ /°                                 | 90                                                            | 90                                                            |
| $\beta$ /°                                  | 101.516(2)                                                    | 104.270(2)                                                    |
| $\gamma$ /°                                 | 90                                                            | 90                                                            |
| Volume/Å <sup>3</sup>                       | 5657.9(2)                                                     | 3187.59(10)                                                   |
| Z                                           | 4                                                             | 14                                                            |
| $\rho_{\text{calc}}$ /cm <sup>3</sup>       | 1.311                                                         | 1.289                                                         |
| $\mu$ /mm <sup>-1</sup>                     | 0.342                                                         | 0.315                                                         |
| F(000)                                      | 2352.0                                                        | 1304.0                                                        |
| Crystal size/mm <sup>3</sup>                | 0.4 × 0.1 × 0.1                                               | 0.2 × 0.2 × 0.2                                               |
| Radiation                                   | Mo K $\alpha$ ( $\lambda$ = 0.71073)                          | Mo K $\alpha$ ( $\lambda$ = 0.71073)                          |
| 2 $\Theta$ range for data collection/°      | 3.822 to 49.998                                               | 4.47 to 49.996                                                |
| Index ranges                                | -14 ≤ h ≤ 14, -19 ≤ k ≤ 20, -33 ≤ l ≤ 32                      | -14 ≤ h ≤ 14, -17 ≤ k ≤ 17, -21 ≤ l ≤ 22                      |
| Reflections collected                       | 60053                                                         | 79538                                                         |
| Independent reflections                     | 9916 [R <sub>int</sub> = 0.0568, R <sub>sigma</sub> = 0.0451] | 5595 [R <sub>int</sub> = 0.1077, R <sub>sigma</sub> = 0.0354] |
| Data/restraints/parameters                  | 9916/2364/741                                                 | 5595/1488/454                                                 |
| Goodness-of-fit on F <sup>2</sup>           | 1.068                                                         | 1.050                                                         |
| Final R indexes [I ≥ 2 $\sigma$ (I)]        | R <sub>1</sub> = 0.0549, wR <sub>2</sub> = 0.1368             | R <sub>1</sub> = 0.0419, wR <sub>2</sub> = 0.1150             |
| Final R indexes [all data]                  | R <sub>1</sub> = 0.0710, wR <sub>2</sub> = 0.1436             | R <sub>1</sub> = 0.0508, wR <sub>2</sub> = 0.1206             |
| Largest diff. peak/hole / e Å <sup>-3</sup> | 0.61/-0.55                                                    | 0.43/-0.38                                                    |

**Table S2.** Kinetic study of CL polymerization with various five-membered ring Ti complexes<sup>a</sup>

|                                                      | [CL]:[Ti]= 100:1            |                         |                          |                          |
|------------------------------------------------------|-----------------------------|-------------------------|--------------------------|--------------------------|
| Time (min)                                           | <b>F<sup>OMe</sup>-Ti</b>   | <b>F<sup>H</sup>-Ti</b> | <b>F<sup>CL</sup>-Ti</b> | <b>F<sup>Bu</sup>-Ti</b> |
|                                                      | PCL conversion <sup>b</sup> |                         |                          |                          |
| 90                                                   |                             | 0.10                    | 0.10                     |                          |
| 150                                                  |                             |                         | 0.26                     |                          |
| 180                                                  | 0.16                        |                         |                          | 0.20                     |
| 200                                                  |                             | 0.30                    |                          |                          |
| 240                                                  |                             |                         | 0.45                     |                          |
| 270                                                  |                             |                         |                          | 0.31                     |
| 300                                                  |                             |                         |                          | 0.36                     |
| 325                                                  |                             | 0.50                    |                          |                          |
| 350                                                  |                             |                         | 0.66                     |                          |
| 360                                                  | 0.33                        |                         |                          |                          |
| 420                                                  |                             |                         | 0.74                     | 0.51                     |
| 455                                                  |                             | 0.69                    |                          |                          |
| 540                                                  | 0.53                        |                         | 0.86                     |                          |
| 600                                                  |                             | 0.80                    |                          |                          |
| 670                                                  | 0.64                        |                         |                          |                          |
| 1080                                                 |                             |                         |                          | 0.90                     |
| 1190                                                 |                             | 0.96                    |                          |                          |
| 1315                                                 | 0.92                        |                         |                          |                          |
|                                                      |                             |                         |                          |                          |
| $k_{\text{obs}} \times 10^3 / \text{min}$<br>(error) | 2.12(1)                     | 2.88(6)                 | 4.10(2)                  | 2.35(4)                  |



|                 |         |        |        |         |
|-----------------|---------|--------|--------|---------|
| I.P min (error) | 154(38) | 61(13) | 79(14) | 104(11) |
| R <sup>2</sup>  | 0.991   | 0.998  | 0.993  | 0.998   |

<sup>a</sup> In general, the reaction was carried out in toluene with [CL] = 2.0 M at 60°C.

<sup>b</sup> The data were determined from <sup>1</sup>H NMR analysis.

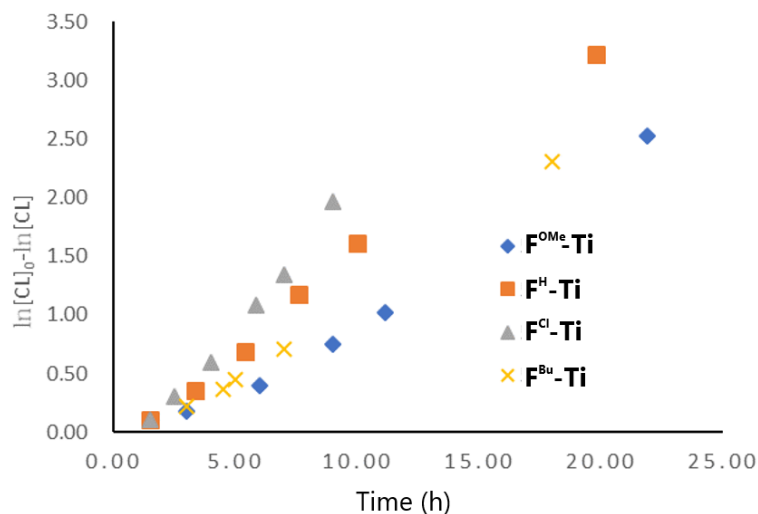

**Figure S1.** First-order kinetic plots of CL polymerization with various five membered ring Ti complexes plotted against time with [CL] = 2.0 M in toluene 5 mL (**Table S3**).

**Table S3.** Kinetic study of CL polymerization with various six-membered ring Ti complexes<sup>a</sup>

|            | [CL]:[Ti]= 100:1            |                    |                     |
|------------|-----------------------------|--------------------|---------------------|
| Time/ hour | S <sup>OMe</sup> -Ti        | S <sup>H</sup> -Ti | S <sup>Cl</sup> -Ti |
|            | PCL conversion <sup>b</sup> |                    |                     |
| 1102       |                             |                    | 0.15                |
| 1200       |                             | 0.19               |                     |
| 1290       | 0.22                        |                    |                     |
| 1410       |                             |                    | 0.22                |
| 1510       | 0.26                        |                    |                     |
| 1520       |                             | 0.26               |                     |
| 1580       |                             |                    | 0.25                |
| 2495       |                             | 0.42               |                     |
| 2900       |                             |                    | 0.49                |
| 3055       | 0.54                        |                    |                     |
| 3100       |                             |                    | 0.52                |

|                                                      |         |         |         |
|------------------------------------------------------|---------|---------|---------|
| 3115                                                 |         | 0.51    |         |
| 3725                                                 |         |         | 0.60    |
| 4110                                                 |         | 0.63    |         |
| 4425                                                 |         |         | 0.69    |
| 4500                                                 | 0.73    |         |         |
| 4505                                                 |         | 0.67    |         |
| 5795                                                 | 0.83    |         |         |
| 5820                                                 |         |         | 0.80    |
| 7100                                                 |         |         | 0.88    |
| 7260                                                 | 0.90    |         |         |
| 8425                                                 |         | 0.90    |         |
|                                                      |         |         |         |
| $k_{\text{obs}} \times 10^4 / \text{min}$<br>(error) | 3.5(1)  | 2.9(1)  | 3.2(1)  |
| I.P min (error)                                      | 666(80) | 576(76) | 725(90) |
| $R^2$                                                | 0.998   | 0.998   | 0.996   |

<sup>a</sup> In general, the reaction was carried out in toluene with  $[\text{CL}] = 2.0 \text{ M}$  at  $60^\circ\text{C}$ .

<sup>b</sup> The data were determined from  $^1\text{H}$  NMR analysis.

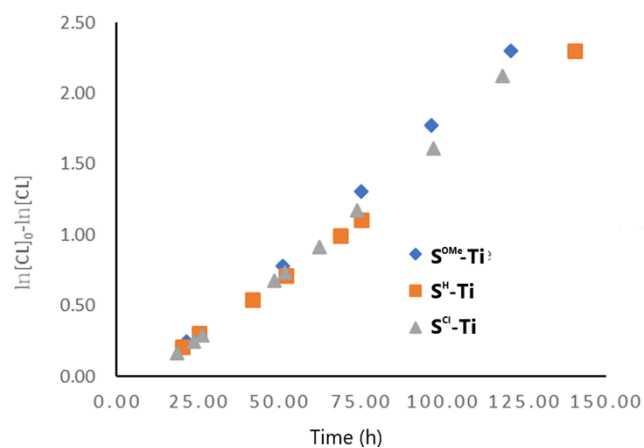

**Figure S2.** First-order kinetic plots of CL polymerization with various six membered ring Ti complexes plotted against time with  $[\text{CL}] = 2.0 \text{ M}$  in toluene 5 mL

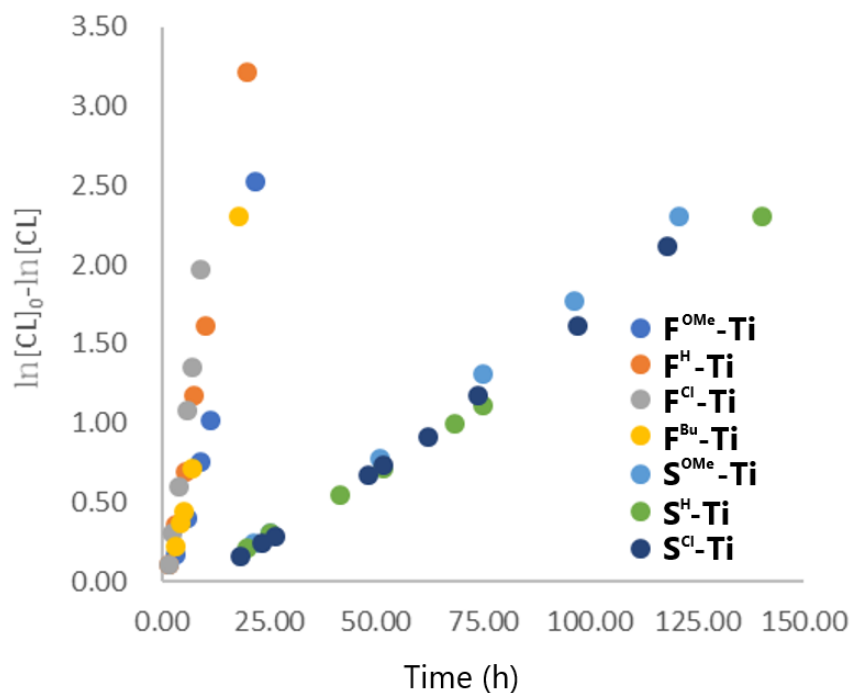

**Figure S3.** First-order kinetic plots of CL polymerization by various five and six membered ring Ti complexes plotted against time with  $[CL] = 2.0$  M in toluene 5 mL

**Table S4.** Kinetic study of CL polymerization with various concentration of  $F^{Cl}\text{-Ti}$  in toluene 5 mL,  $[CL] = 2.0$  M at  $60^\circ\text{C}^a$

|      | $[CL]:[F^{Cl}\text{-Ti}]$   |       |       |       |
|------|-----------------------------|-------|-------|-------|
| time | 100:1                       | 100:2 | 100:4 | 100:6 |
| min  | PCL conversion <sup>b</sup> |       |       |       |
| 10   |                             |       | 0.10  |       |
| 15   |                             |       | 0.17  | 0.22  |
| 20   |                             |       |       | 0.34  |
| 25   |                             |       |       | 0.47  |
| 30   |                             |       | 0.42  | 0.59  |
| 40   |                             | 0.21  |       |       |
| 50   |                             |       | 0.72  |       |
| 55   |                             |       |       | 0.85  |
| 65   |                             |       | 0.83  |       |
| 70   |                             | 0.40  |       |       |
| 90   | 0.10                        | 0.54  |       |       |
| 115  |                             | 0.67  |       |       |
| 140  |                             | 0.75  |       |       |

|                                                           |        |        |         |        |
|-----------------------------------------------------------|--------|--------|---------|--------|
| 150                                                       | 0.26   |        |         |        |
| 200                                                       |        | 0.89   |         |        |
| 240                                                       | 0.45   |        |         |        |
| 350                                                       | 0.66   |        |         |        |
| 420                                                       | 0.74   |        |         |        |
| 540                                                       | 0.86   |        |         |        |
|                                                           |        |        |         |        |
| $k_{\text{obs}} \times 10^4 / \text{min}^{-1}$<br>(error) | 41(2)  | 125(4) | 309(20) | 417(9) |
| I.P/ min<br>(error)                                       | 79(14) | 26(3)  | 9(2)    | 9(1)   |
| R <sup>2</sup>                                            | 0.993  | 0.998  | 0.996   | 0.999  |

<sup>a</sup> In general, the reaction was carried out in toluene with  $[\text{CL}] = 2.0 \text{ M}$  at  $60^\circ\text{C}$ .

<sup>b</sup> The data were determined from  $^1\text{H}$  NMR analysis.

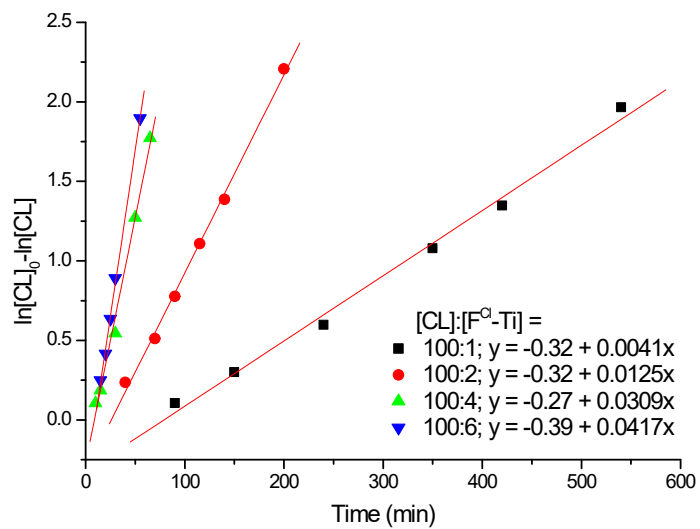

**Figure S4.** First-order kinetic plots of CL polymerization with various concentrations of  $[\text{F}^{\text{Cl}}\text{-Ti}]$  plotted against time with  $[\text{CL}] = 2.0 \text{ M}$  in toluene 5 mL

**Table S5.** Kinetic study of LA polymerization with various five-membered ring Ti complexes<sup>a</sup>

|                                                 | [LA]:[Ti]=25:1              |                    |                     |                     |
|-------------------------------------------------|-----------------------------|--------------------|---------------------|---------------------|
| Time (min)                                      | F <sup>OMe</sup> -Ti        | F <sup>H</sup> -Ti | F <sup>Cl</sup> -Ti | F <sup>Bu</sup> -Ti |
|                                                 | PLA conversion <sup>b</sup> |                    |                     |                     |
| 30                                              |                             | 0.24               | 0.23                |                     |
| 60                                              |                             |                    |                     | 0.34                |
| 70                                              |                             | 0.38               |                     |                     |
| 90                                              |                             | 0.43               | 0.42                |                     |
| 110                                             | 0.33                        |                    |                     |                     |
| 120                                             |                             |                    | 0.48                |                     |
| 135                                             |                             |                    |                     | 0.46                |
| 150                                             | 0.38                        | 0.53               | 0.55                |                     |
| 183                                             |                             |                    | 0.61                |                     |
| 222                                             |                             |                    | 0.65                |                     |
| 230                                             | 0.48                        |                    |                     |                     |
| 240                                             |                             | 0.68               |                     |                     |
| 250                                             |                             |                    | 0.69                |                     |
| 270                                             |                             |                    |                     | 0.61                |
| 280                                             |                             |                    | 0.72                |                     |
| 290                                             | 0.51                        |                    |                     |                     |
| 300                                             |                             |                    |                     | 0.63                |
| 350                                             | 0.55                        |                    |                     |                     |
| 355                                             |                             |                    | 0.79                |                     |
| 410                                             | 0.60                        |                    |                     |                     |
| 430                                             |                             |                    | 0.85                |                     |
| 450                                             |                             | 0.87               |                     |                     |
| 530                                             | 0.65                        |                    |                     |                     |
| 540                                             |                             |                    | 0.91                |                     |
| 650                                             | 0.69                        |                    |                     |                     |
| 1080                                            |                             |                    |                     | 0.90                |
| 1250                                            | 0.85                        |                    |                     |                     |
| 1510                                            | 0.90                        |                    |                     |                     |
|                                                 |                             |                    |                     |                     |
| k <sub>obs</sub> × 10 <sup>3</sup> /min (error) | 1.30 (3)                    | 4.14 (8)           | 4.08 (6)            | 1.79 (9)            |
| R <sup>2</sup>                                  | 0.995                       | 0.998              | 0.997               | 0.992               |

<sup>a</sup> In general, the reaction was carried out in toluene with [LA] = 0.5 M at 60°C.

<sup>b</sup> The data were determined from <sup>1</sup>H NMR analysis.

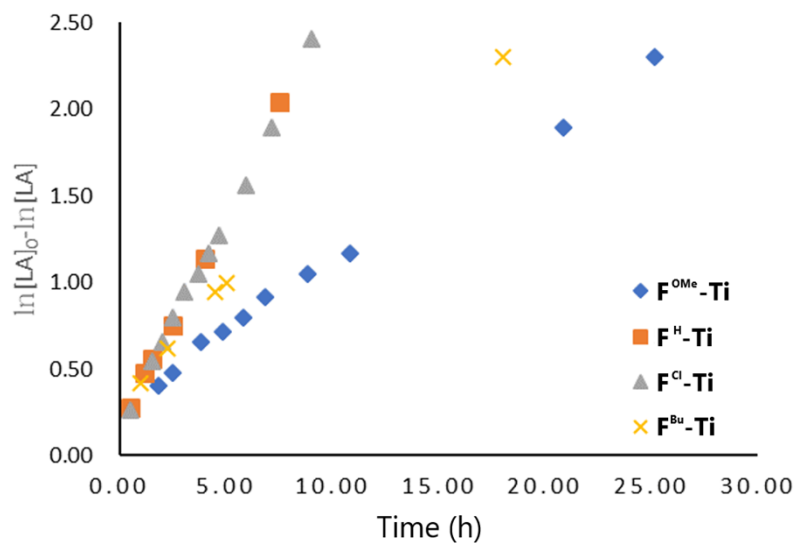

**Figure S5.** First-order kinetic plots of LA polymerization by various five membered ring Ti complexes plotted against time with  $[LA] = 0.5$  M in toluene 5 mL (**Table S1**)

**Table S6.** Kinetic study of LA polymerization with various six-membered ring Ti complexes<sup>a</sup>

|          | [LA]:[Ti]= 25:1             |                    |                     |
|----------|-----------------------------|--------------------|---------------------|
| Time (h) | S <sup>OMe</sup> -Ti        | S <sup>H</sup> -Ti | S <sup>Cl</sup> -Ti |
|          | PLA conversion <sup>b</sup> |                    |                     |
| 3.41     |                             | 0.20               |                     |
| 4.00     |                             |                    | 0.19                |
| 8.41     |                             |                    | 0.24                |
| 10.58    | 0.25                        |                    |                     |
| 18.38    |                             |                    | 0.36                |
| 20.00    |                             | 0.35               |                     |
| 21.50    | 0.34                        |                    |                     |
| 23.50    |                             |                    | 0.41                |
| 25.16    | 0.38                        |                    |                     |
| 26.33    |                             |                    | 0.43                |
| 41.58    |                             | 0.49               |                     |
| 50.91    | 0.56                        |                    |                     |
| 51.66    |                             |                    | 0.59                |
| 68.50    |                             | 0.62               |                     |
| 73.75    |                             |                    | 0.68                |
| 75.00    | 0.68                        |                    |                     |
| 75.08    |                             | 0.65               |                     |
| 96.58    | 0.75                        |                    |                     |
| 97.00    |                             |                    | 0.76                |

|                                                      |         |         |         |
|------------------------------------------------------|---------|---------|---------|
| 118.33                                               |         |         | 0.82    |
| 121.00                                               | 0.82    |         |         |
| 140.41                                               |         | 0.83    |         |
| 142.33                                               |         |         | 0.87    |
| 144.50                                               | 0.86    |         |         |
| 150.10                                               |         | 0.85    |         |
| 156.36                                               |         |         | 0.90    |
|                                                      |         |         |         |
| $k_{\text{obs}} \times 10^4 / \text{min}$<br>(error) | 2.1 (0) | 1.8 (0) | 2.2 (1) |
| $R^2$                                                | 0.999   | 0.998   | 0.998   |

<sup>a</sup> In general, the reaction was carried out in toluene with  $[\text{LA}] = 0.5 \text{ M}$  at  $60^\circ\text{C}$ .

<sup>b</sup> The data were determined from  $^1\text{H NMR}$  analysis.

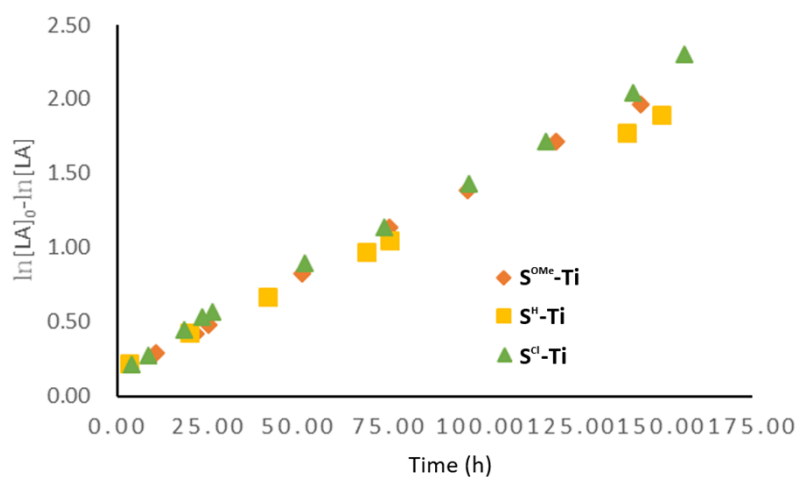

**Figure S6.** First-order kinetic plots of LA polymerization by various six membered ring Ti complexes plotted against time with  $[\text{LA}] = 0.5 \text{ M}$  in toluene 5 mL (**Table S2**).



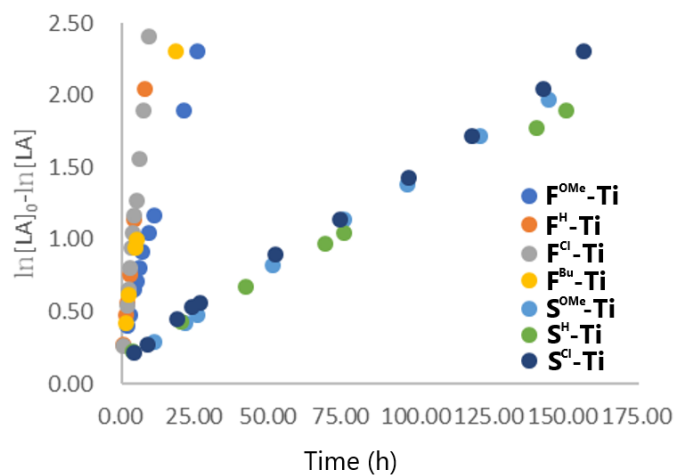

**Figure S7.** First-order kinetic plots of LA polymerization by various five and six membered ring Ti complexes plotted against time with  $[LA] = 0.5$  M in toluene 5 mL

**Table. S7** Kinetic study of LA polymerization with  $F^H-Ti$ <sup>a</sup> in various concentrations

|           | $[LA]: [F^H-Ti]$            |        |      |      |
|-----------|-----------------------------|--------|------|------|
|           | 25:0.25                     | 25:0.5 | 25:1 | 25:2 |
| Time/ min | PLA conversion <sup>b</sup> |        |      |      |
| 1         |                             |        |      | 0.01 |
| 3         |                             |        |      | 0.17 |
| 5         |                             |        | 0.31 | 0.31 |
| 9         |                             |        |      | 0.50 |
| 10        |                             | 0.35   |      |      |
| 15        |                             |        | 0.46 |      |
| 16        |                             |        |      | 0.73 |
| 20        |                             | 0.45   | 0.51 | 0.80 |
| 35        |                             |        | 0.61 | 0.94 |
| 50        |                             | 0.60   |      | 0.98 |
| 60        | 0.46                        |        | 0.74 |      |

|                                                           |       |        |        |        |
|-----------------------------------------------------------|-------|--------|--------|--------|
| 70                                                        |       | 0.69   |        |        |
| 80                                                        | 0.49  |        |        |        |
| 110                                                       |       |        | 0.88   |        |
| 160                                                       | 0.59  |        |        |        |
| 180                                                       |       | 0.89   |        |        |
| 230                                                       | 0.65  |        |        |        |
| 360                                                       | 0.73  |        |        |        |
| 540                                                       | 0.82  |        |        |        |
| 710                                                       | 0.87  |        |        |        |
|                                                           |       |        |        |        |
| $k_{\text{obs}} \times 10^4 / \text{min}^{-1}$<br>(error) | 22(0) | 103(4) | 162(4) | 799(3) |
| I.P/ min (error)                                          | 0(8)  | 0(3)   | 0(0)   | 0(0)   |
| $R^2$                                                     | 0.998 | 0.997  | 0.998  | 0.999  |

<sup>a</sup> In general, the reaction was carried out in toluene with  $[\text{LA}] = 0.5 \text{ M}$  at  $90^\circ\text{C}$ .

<sup>b</sup> The data were determined from  $^1\text{H}$  NMR analysis.

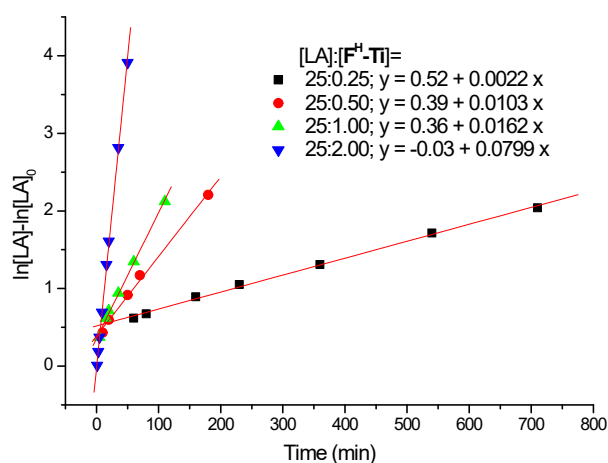

**Figure S8.** First-order kinetic plots of LA polymerization with various concentrations of  $[\text{F}^{\text{H}}\text{-Ti}]$  plotted against time with  $[\text{LA}] = 0.5 \text{ M}$  in toluene 5 mL

**Table. S8.** Measuring polymer's molar masses at different times/conversions for CL polymerization using **F<sup>Cl</sup>-Ti** as a catalyst

| Entry | Time(min) | Conv. (%) <sup>a</sup> | <b>Mn</b> <sub>cacl.</sub> <sup>b</sup> | <b>Mn</b> <sub>GPC</sub> <sup>c</sup> | <b>D</b> <sup>c</sup> |
|-------|-----------|------------------------|-----------------------------------------|---------------------------------------|-----------------------|
| 1     | 10        | 5                      | 1200                                    | 1735                                  | 1.08                  |
| 2     | 20        | 18                     | 4164                                    | 3696                                  | 1.07                  |
| 3     | 30        | 29                     | 6672                                    | 5639                                  | 1.11                  |
| 4     | 40        | 36                     | 8268                                    | 7461                                  | 1.15                  |
| 5     | 50        | 57                     | 13056                                   | 8320                                  | 1.20                  |
| 6     | 60        | 64                     | 14652                                   | 9379                                  | 1.24                  |
| 7     | 75        | 78                     | 17160                                   | 9221                                  | 1.30                  |
| 8     | 90        | 87                     | 19896                                   | 10028                                 | 1.40                  |
| 9     | 105       | 91                     | 20808                                   | 10851                                 | 1.35                  |

The reaction was carried out in toluene with [CL] = 8 M, [CL]:[Cat]= 200:1, at 90°C

<sup>a</sup> Data were obtained through <sup>1</sup>H NMR analysis.

<sup>b</sup> Calculated from the molecular weight of Mw(CL) × [CL]<sub>0</sub>/2[Cat]<sub>0</sub> × conversion yield + Mw(PrOH).

<sup>c</sup> Obtained through gel permeation chromatography (GPC). Values of *Mn*<sub>GPC</sub> were obtained times 0.56 for PCL.

**Table. S9.** Measuring polymer's molar masses at different times/conversions for LA polymerization using **F<sup>H</sup>-Ti** as a catalyst

| Entry | Time(hr) | Conv. (%) <sup>a</sup> | <b>Mn</b> <sub>cacl.</sub> <sup>b</sup> | <b>Mn</b> <sub>GPC</sub> <sup>c</sup> | <b>D</b> <sup>c</sup> |
|-------|----------|------------------------|-----------------------------------------|---------------------------------------|-----------------------|
| 1     | 1.50     | 15                     | 2760                                    | 1040                                  | 1.13                  |
| 2     | 4.37     | 34                     | 6180                                    | 2201                                  | 1.10                  |
| 3     | 7.83     | 51                     | 9240                                    | 3212                                  | 1.07                  |
| 4     | 10.25    | 54                     | 9780                                    | 3657                                  | 1.10                  |
| 5     | 23.50    | 76                     | 13740                                   | 5231                                  | 1.16                  |
| 6     | 30.50    | 86                     | 15540                                   | 5591                                  | 1.20                  |
| 7     | 48.87    | 94                     | 16980                                   | 6309                                  | 1.29                  |

The reaction was carried out in toluene with [LA] = 3.125 M, [LA]:[Cat]= 100:1, at 90°C

<sup>a</sup> Data were obtained through <sup>1</sup>H NMR analysis.

<sup>b</sup> Calculated from the molecular weight of Mw(LA) × [LA]<sub>0</sub>/2[Cat]<sub>0</sub> × conversion yield + Mw(PrOH).

<sup>c</sup> Obtained through gel permeation chromatography (GPC). Values of *Mn*<sub>GPC</sub> were obtained times 0.58 for PLA.

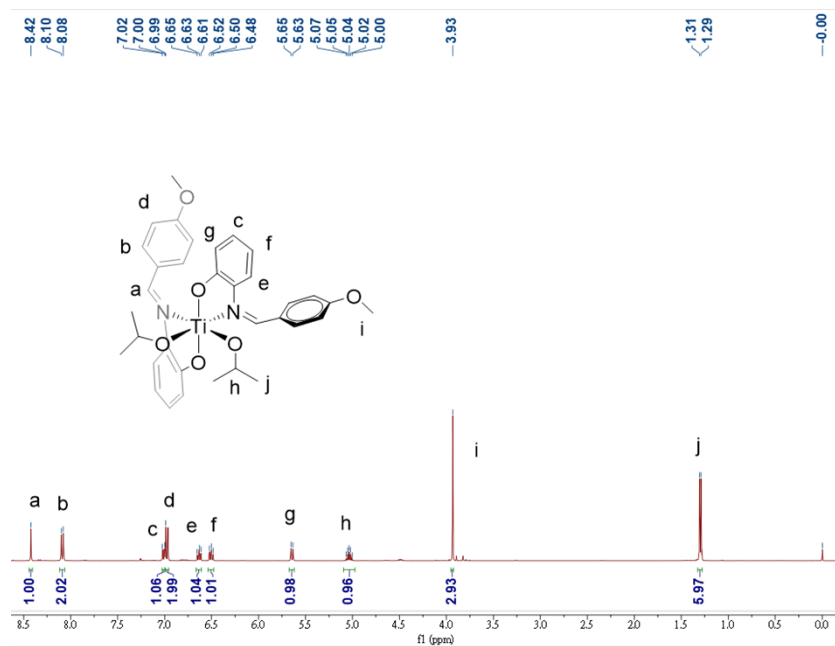

**Figure S9.** <sup>1</sup>H NMR spectrum of **F<sup>OMe</sup>-Ti** in CDCl<sub>3</sub>

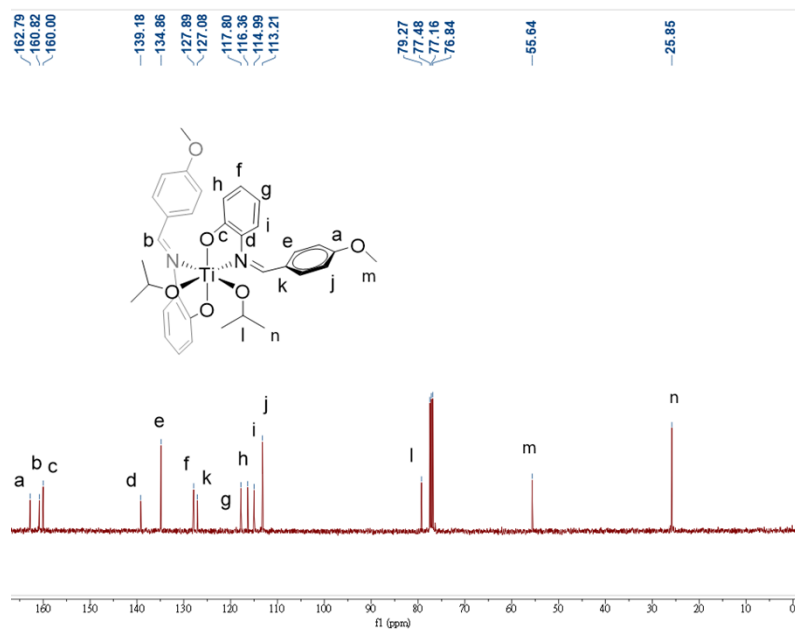

**Figure S10.** <sup>13</sup>C NMR spectrum of **F<sup>OMe</sup>-Ti** in CDCl<sub>3</sub>

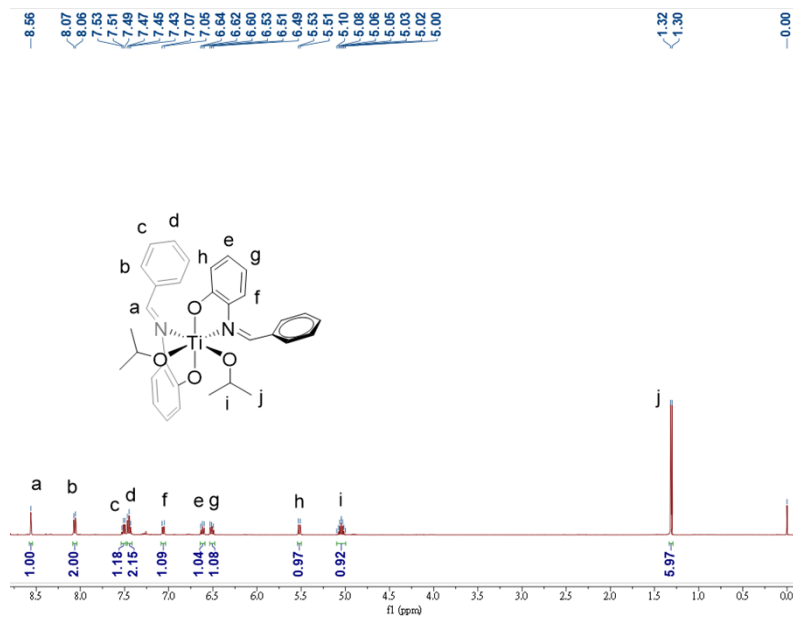

Figure S11.  $^1\text{H}$  NMR spectrum of  $\text{F}^{\text{H}}\text{-Ti}$  in  $\text{CDCl}_3$

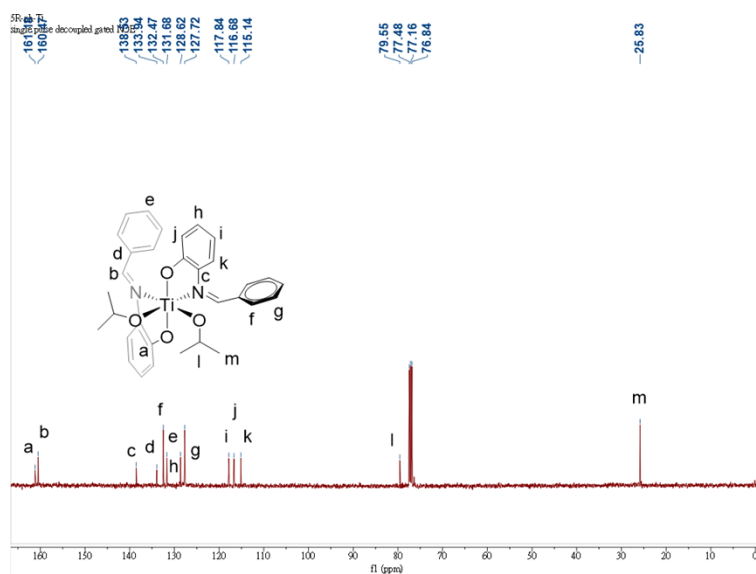

Figure S12.  $^{13}\text{C}$  NMR spectrum of  $\text{F}^{\text{H}}\text{-Ti}$  in  $\text{CDCl}_3$

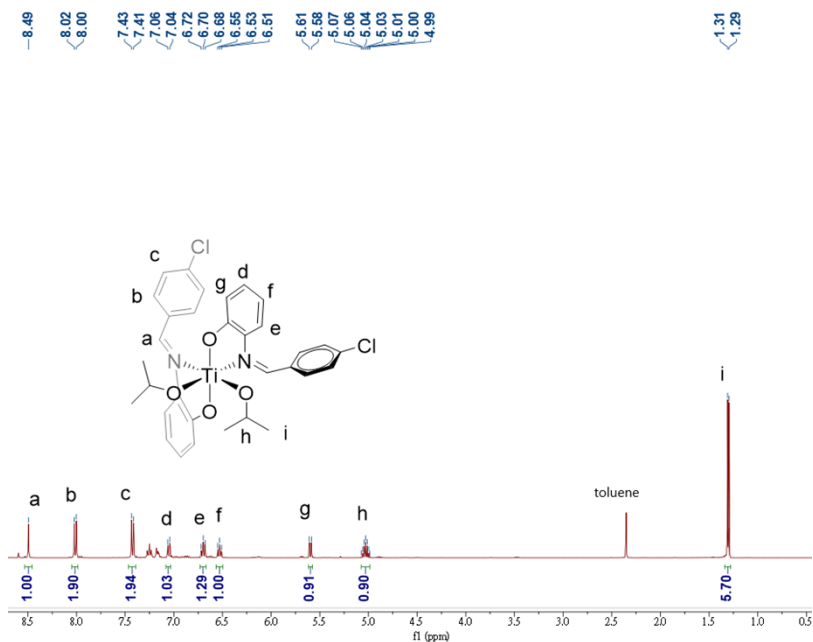

Figure S13.  $^1\text{H}$  NMR spectrum of  $F^{Cl}\text{-Ti}$  in  $\text{CDCl}_3$

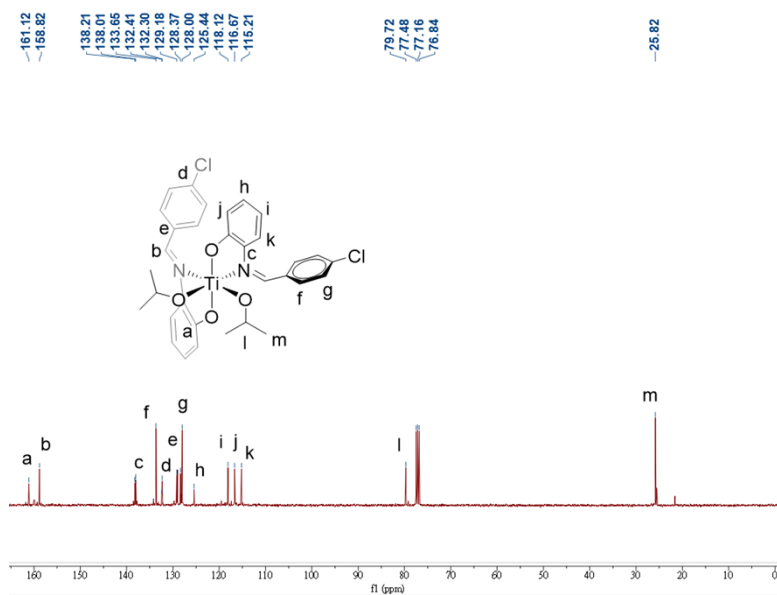

Figure S14.  $^{13}\text{C}$  NMR spectrum of  $F^{Cl}\text{-Ti}$  in  $\text{CDCl}_3$

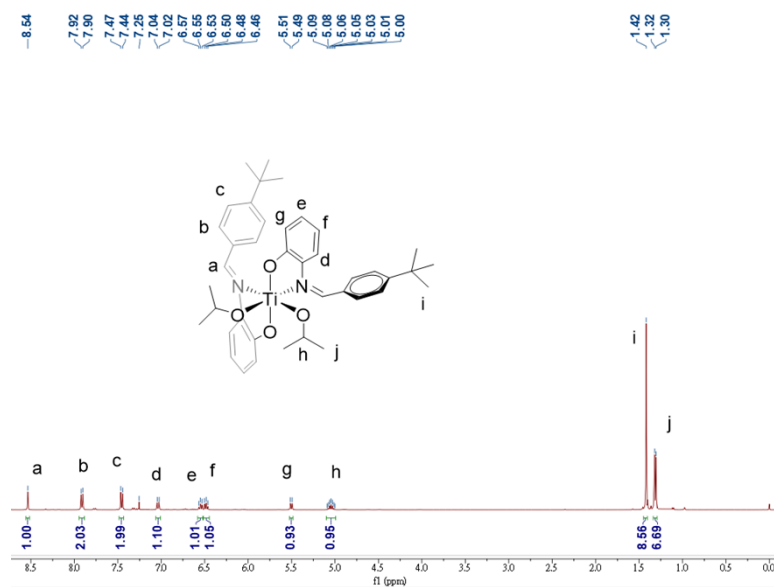

**Figure S15.  $^1\text{H}$  NMR spectrum of  $\text{F}^{\text{Bu}}\text{-Ti}$  in  $\text{CDCl}_3$**

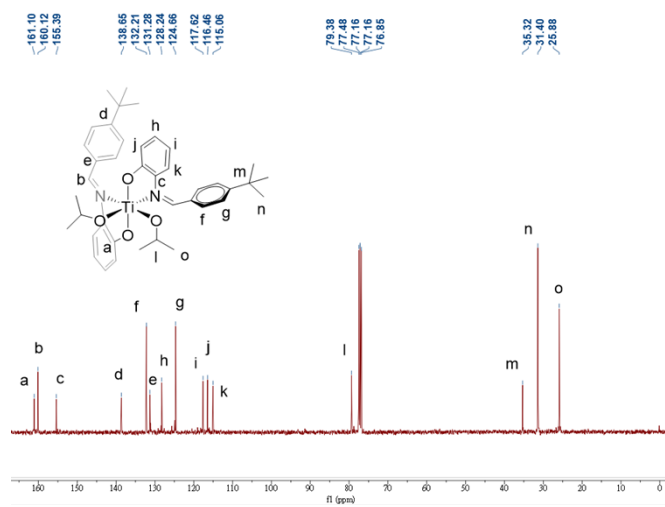

**Figure S16.  $^{13}\text{C}$  NMR spectrum of  $\text{F}^{\text{Bu}}\text{-Ti}$  in  $\text{CDCl}_3$**

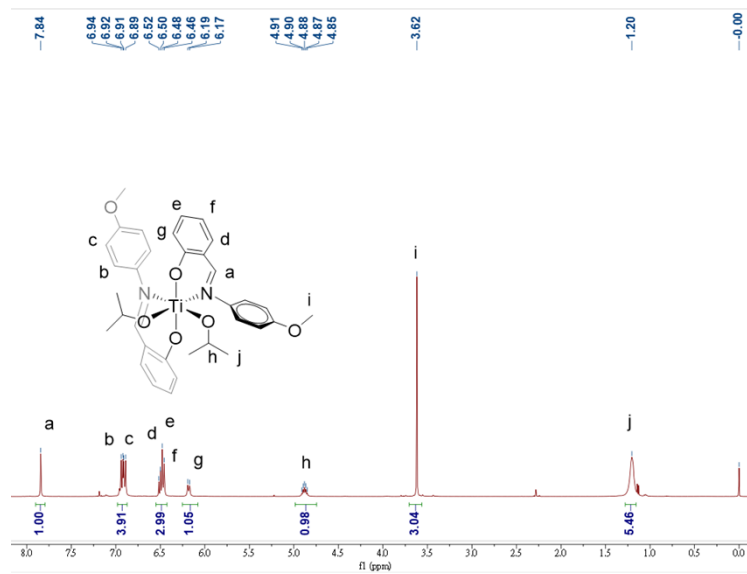

Figure S17.  $^1\text{H}$  NMR spectrum of  $S^{OMe}\text{-Ti}$  in  $\text{CDCl}_3$

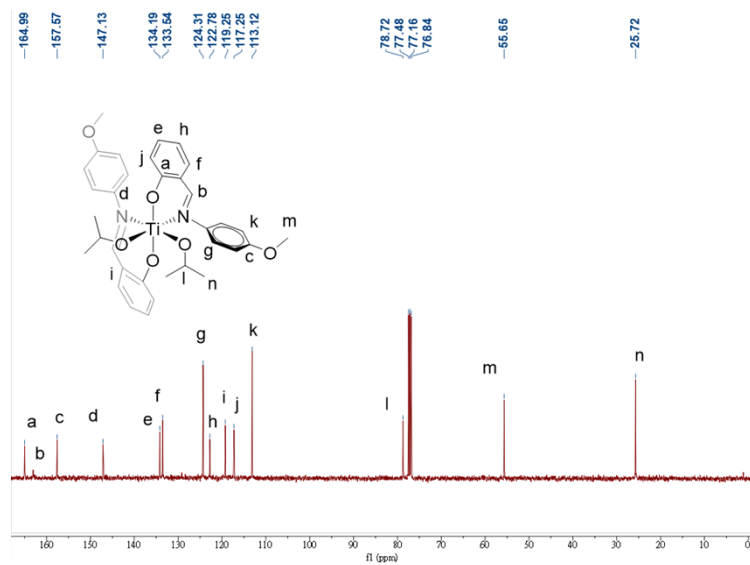

Figure S18.  $^{13}\text{C}$  NMR spectrum of  $S^{OMe}\text{-Ti}$  in  $\text{CDCl}_3$



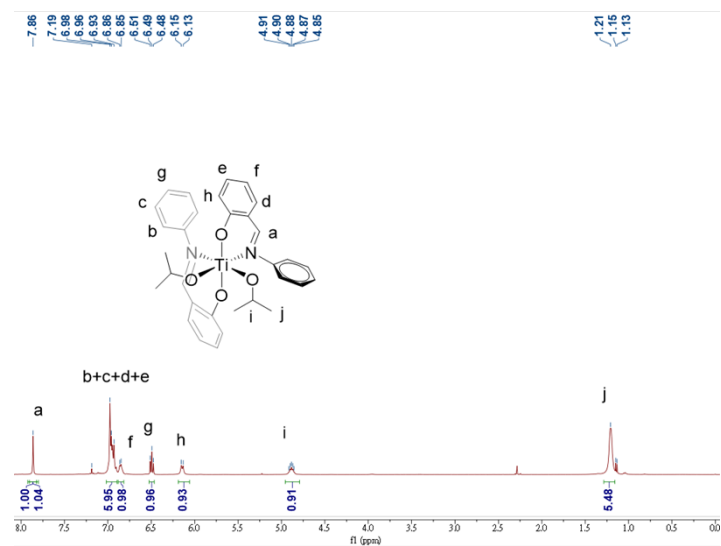

Figure S19.  $^1\text{H}$  NMR spectrum of  $S^H\text{-Ti}$  in  $\text{CDCl}_3$

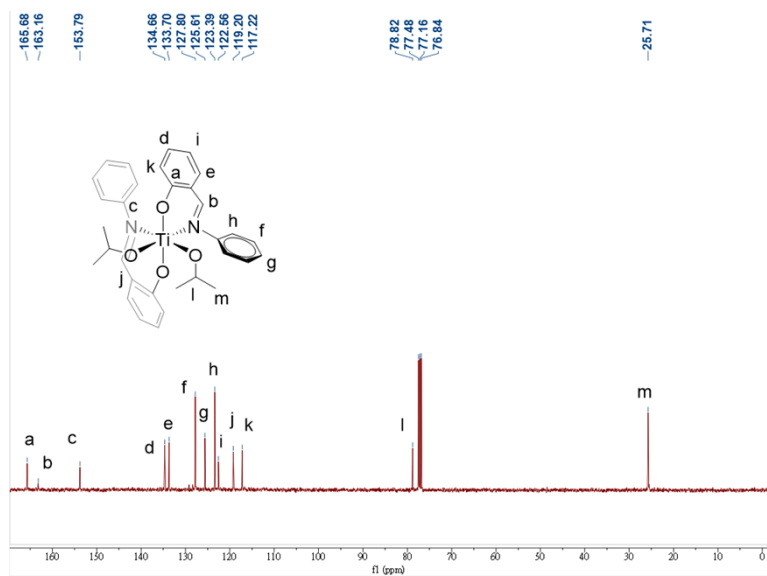

Figure S20.  $^{13}\text{C}$  NMR spectrum of  $S^H\text{-Ti}$  in  $\text{CDCl}_3$

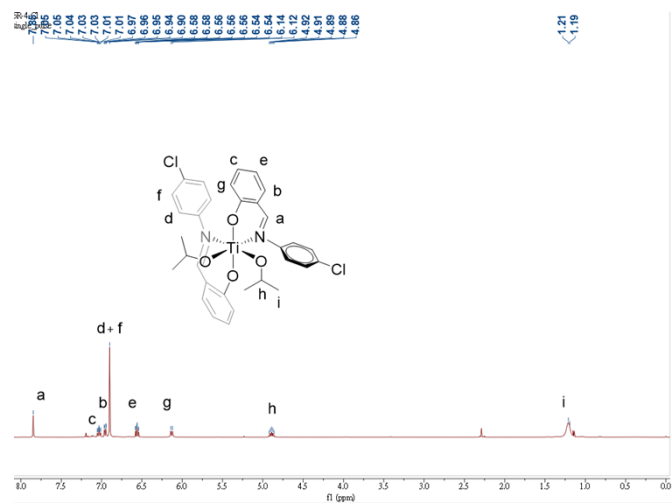

Figure S21.  $^1\text{H}$  NMR spectrum of  $\text{S}^{\text{Cl}}\text{-Ti}$  in  $\text{CDCl}_3$

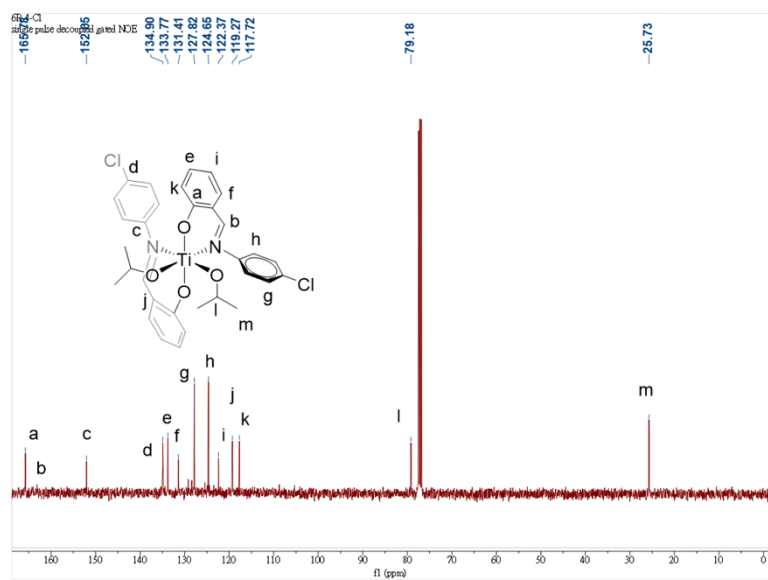

Figure S22.  $^{13}\text{C}$  NMR spectrum of  $\text{S}^{\text{Cl}}\text{-Ti}$  in  $\text{CDCl}_3$



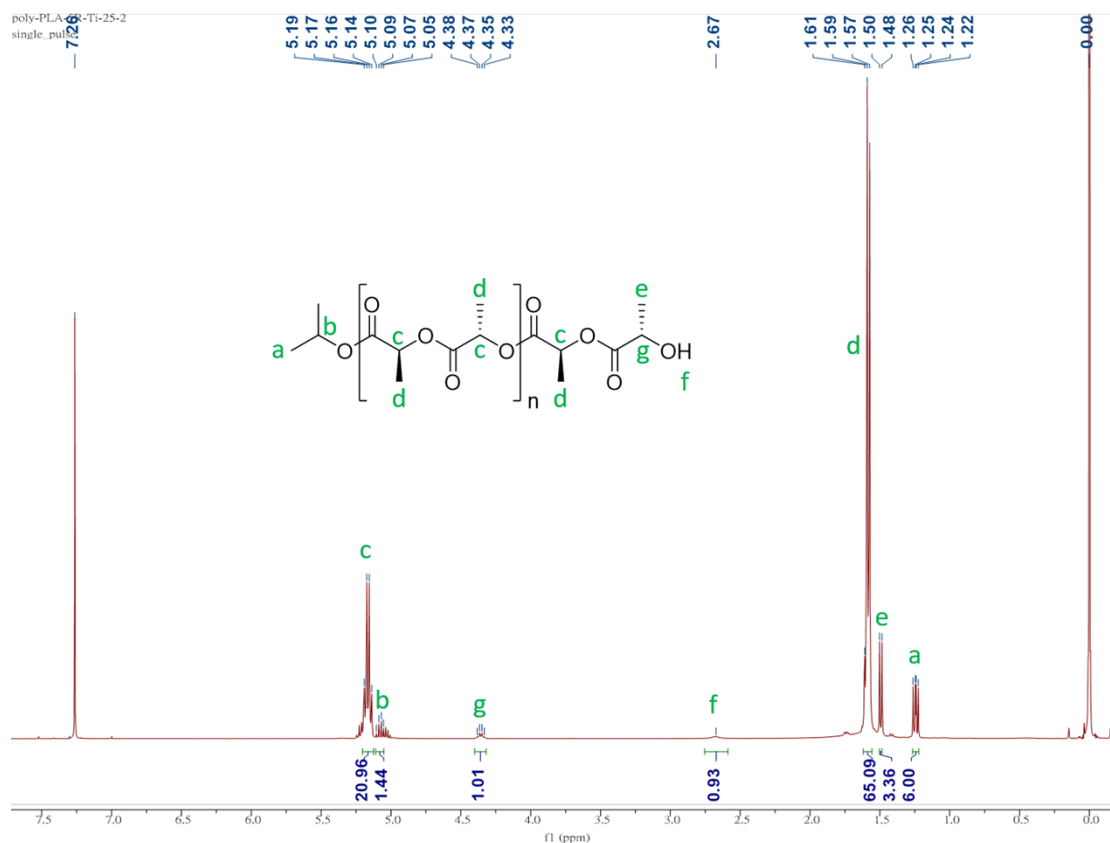

**Figure S25.**  $^1\text{H}$  NMR spectrum of PLA in  $\text{CDCl}_3$  (entry 9 of Table 3)

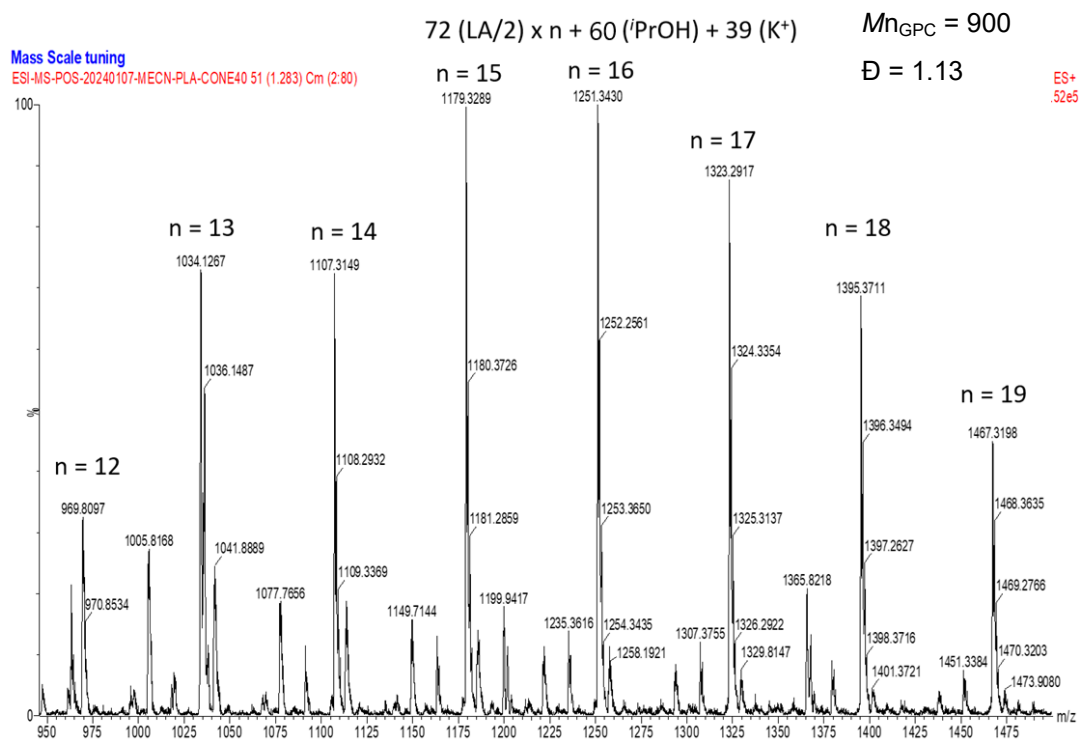

**Figure S26.** ESI-MS spectra of PCL synthesized by using  $\text{F}^{\text{H}}\text{-Ti}$

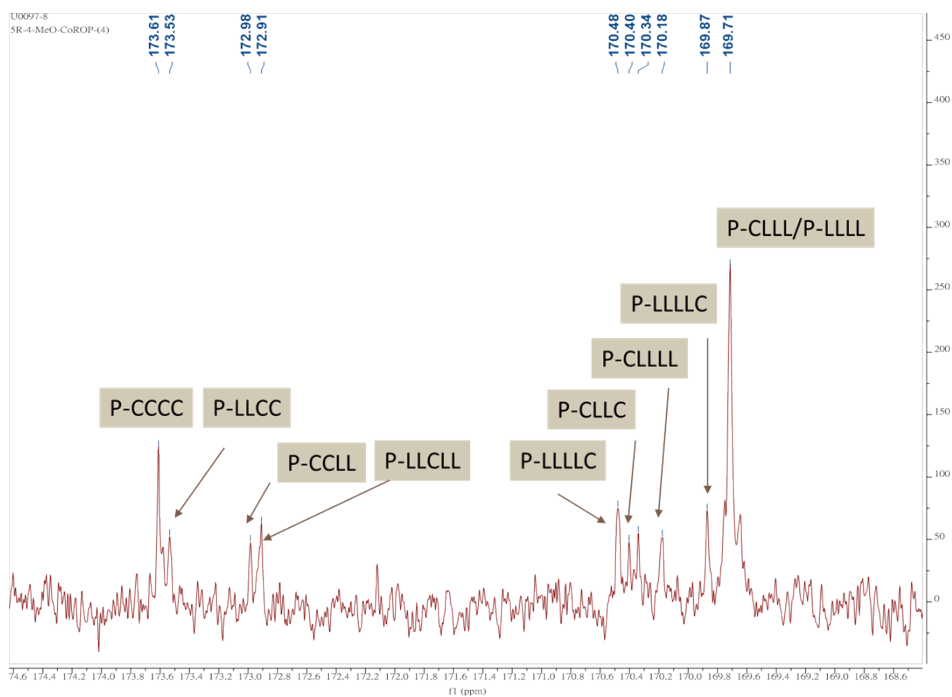

**Figure S27.**  $^{13}\text{C}$  NMR of copolymer PLA-*grad*-PCL (entry 4 of Table 4) by  $\text{FOMe-Ti}$

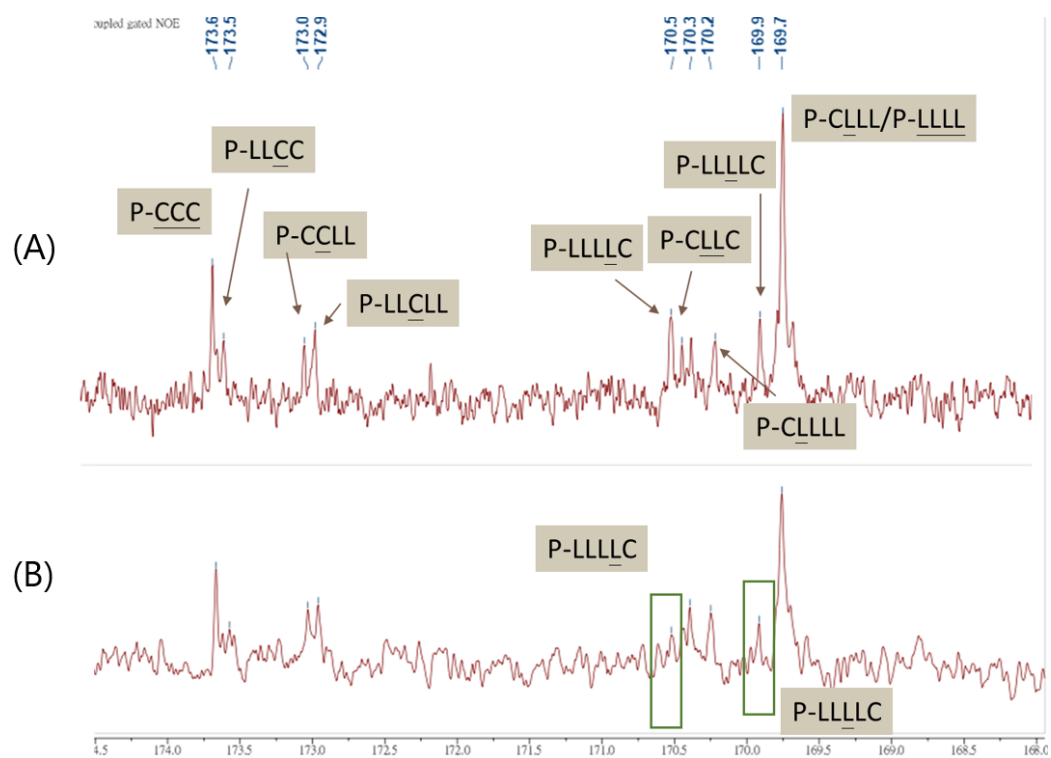

**Figure S28.**  $^{13}\text{C}$  NMR of copolymer PLA-*grad*-PCL polymerized by  $\text{FOMe-Ti}$  (A) and  $\text{SOMe-Ti}$  (B)

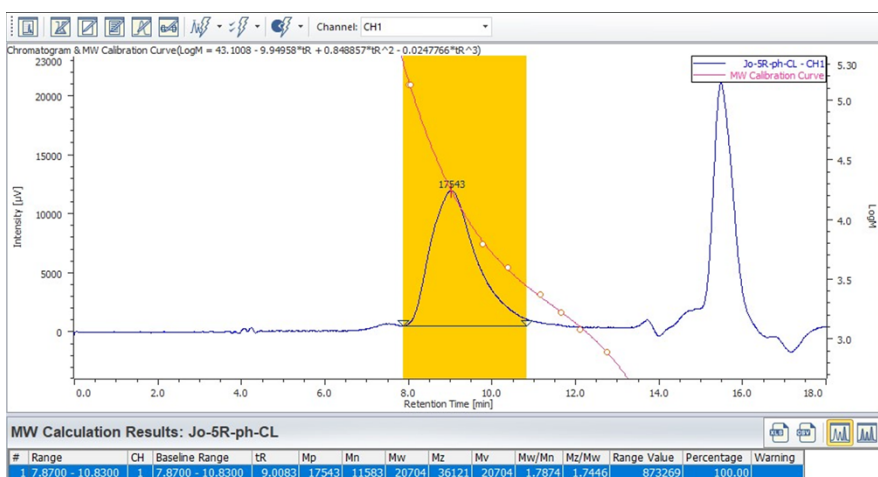

Figure S29. GPC spectrum of PCL (entry 1 of Table 1)

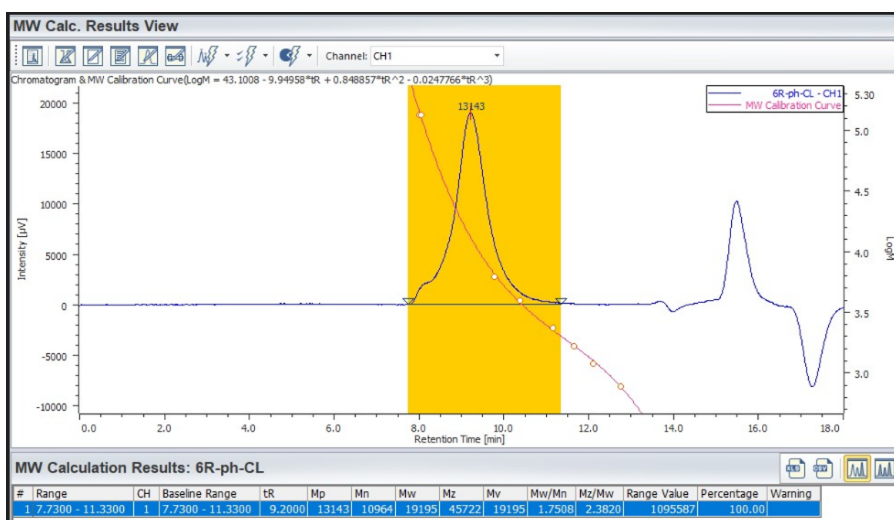

Figure S30. GPC spectrum of PCL (entry 2 of Table 1)

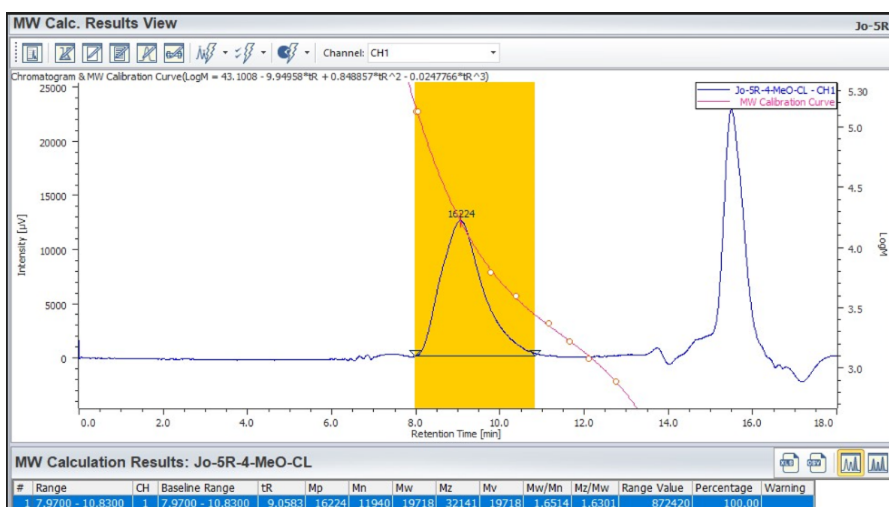

Figure S31. GPC spectrum of PCL (entry 3 of Table 1)

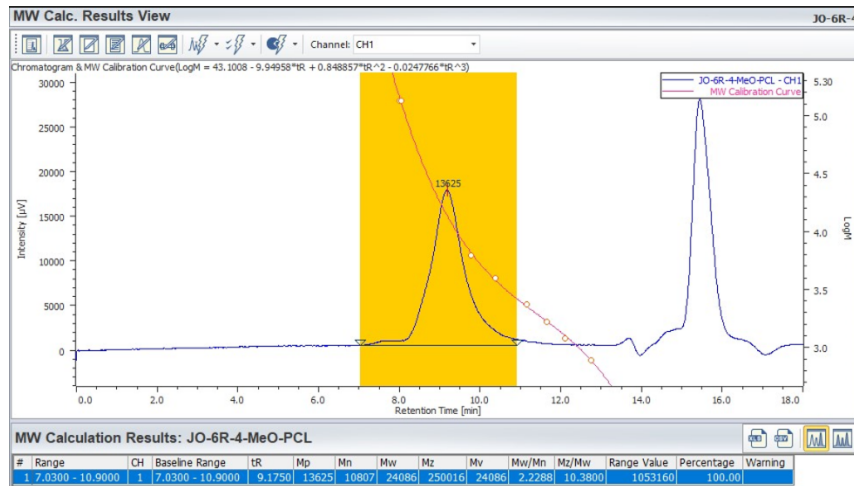

Figure S32. GPC spectrum of PCL (entry 4 of Table 1)

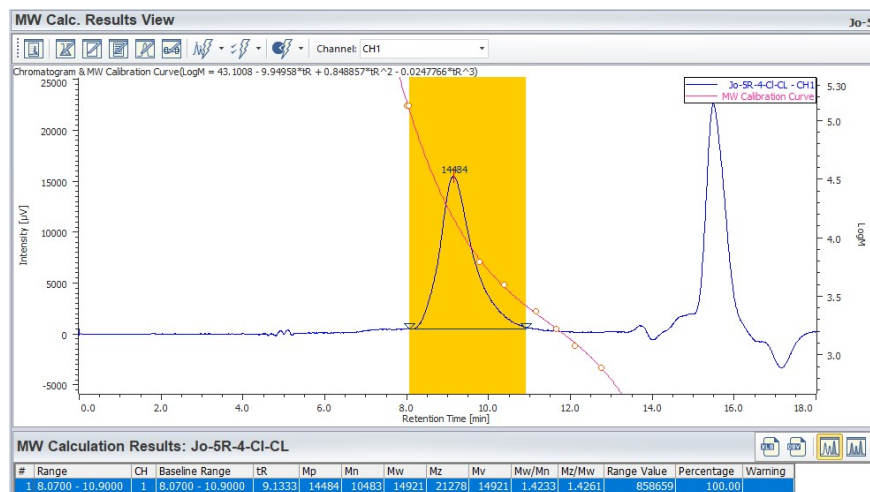

Figure S33. GPC spectrum of PCL (entry 5 of Table 1)

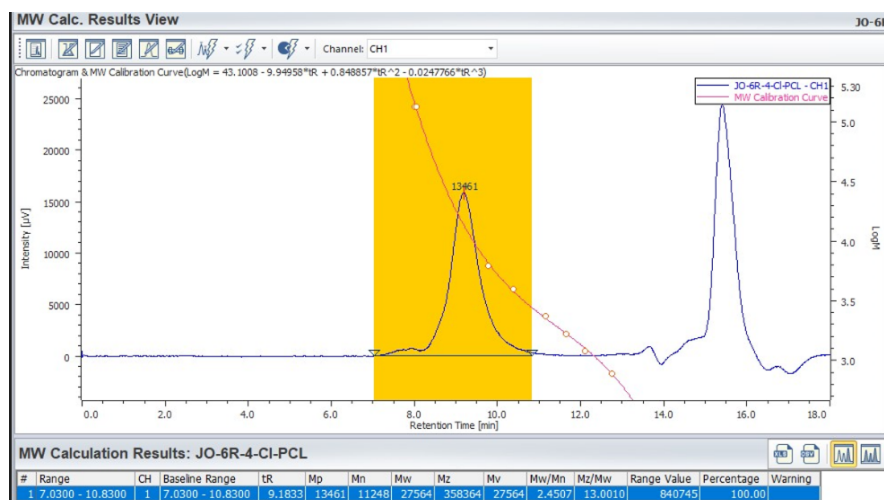

Figure S34. GPC spectrum of PCL (entry 6 of Table 1)

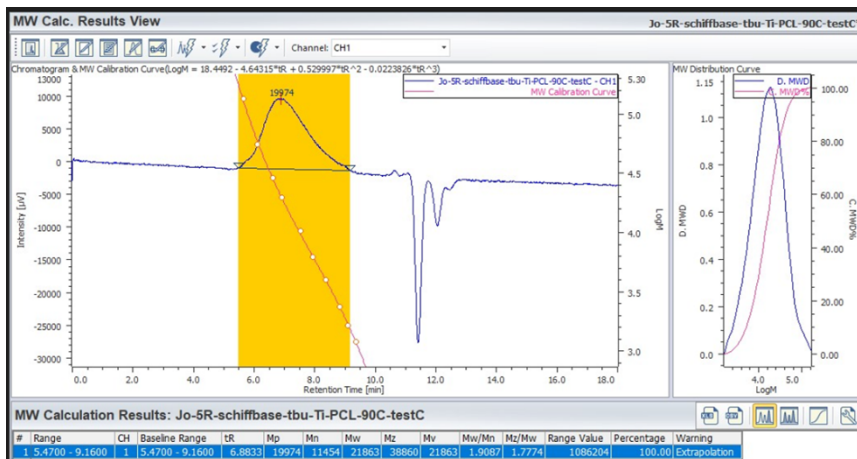

Figure S35. GPC spectrum of PCL (entry 7 of Table 1)

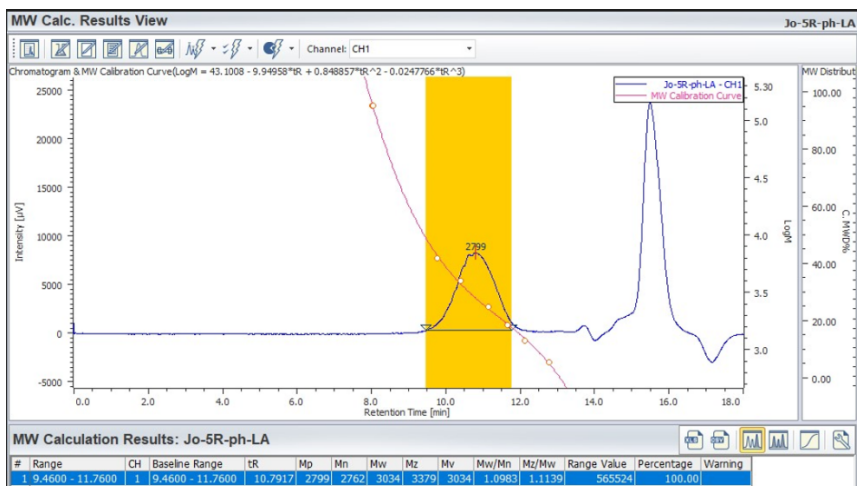

Figure S36. GPC spectrum of PLA (entry 1 of Table 2)

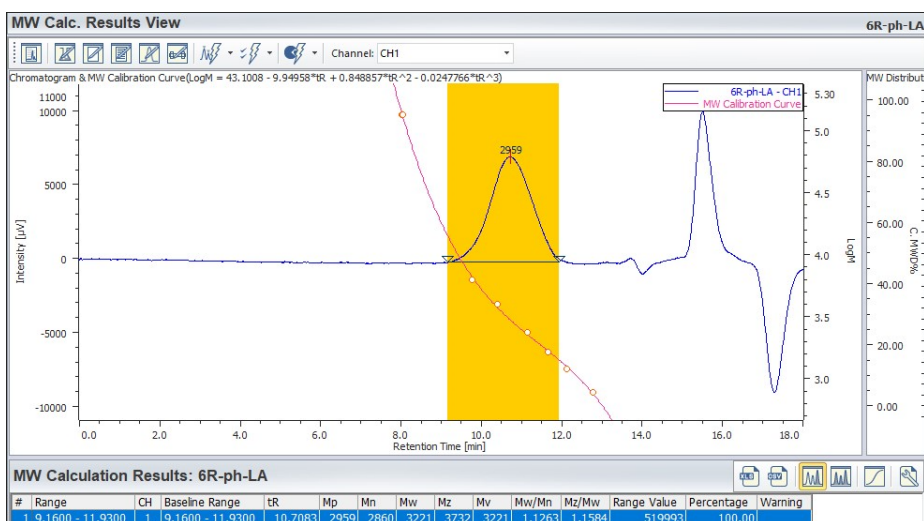

Figure S37. GPC spectrum of PLA (entry 2 of Table 2)



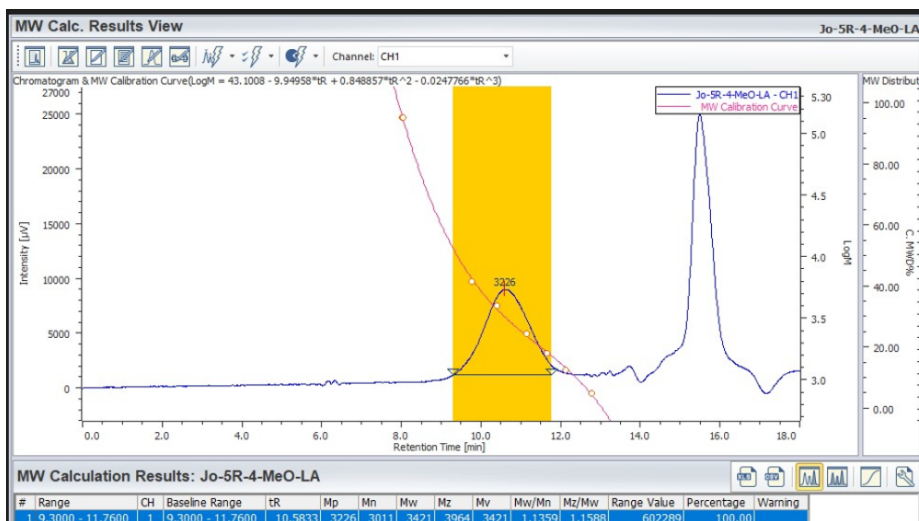

Figure S38. GPC spectrum of PLA (entry 3 of Table 2)

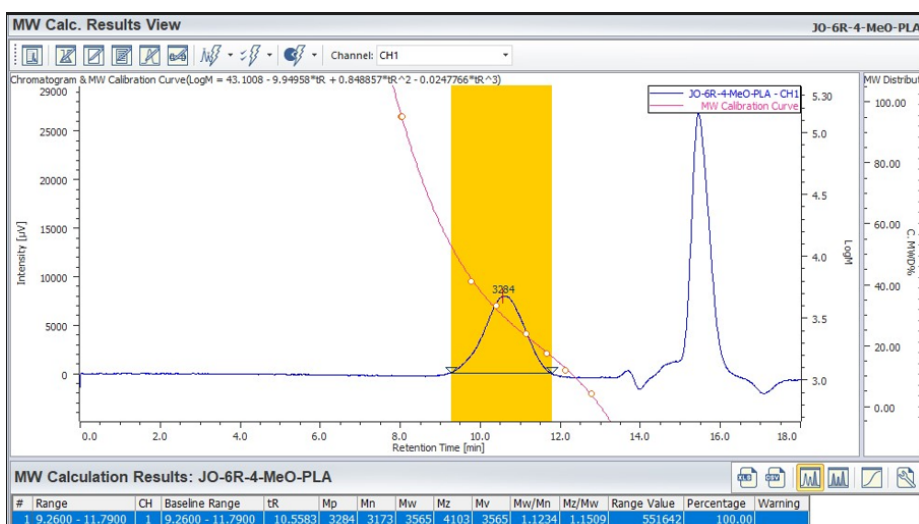

Figure S39. GPC spectrum of PLA (entry 4 of Table 2)

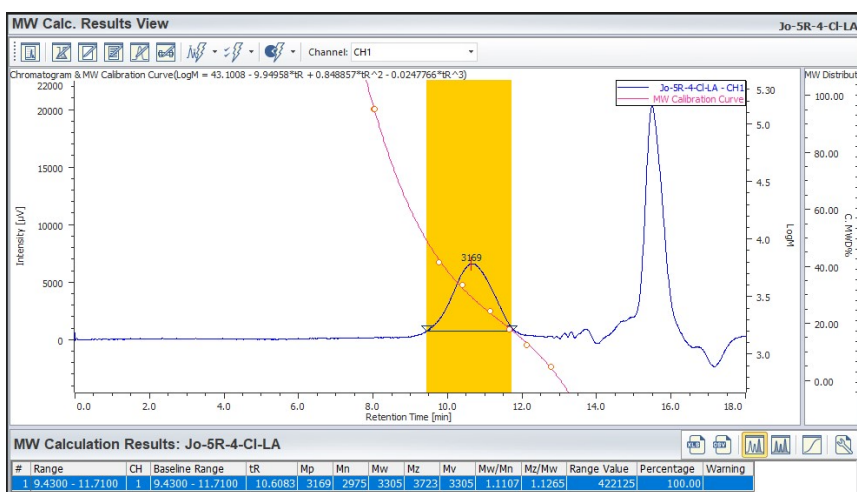

Figure S40. GPC spectrum of PLA (entry 5 of Table 2)

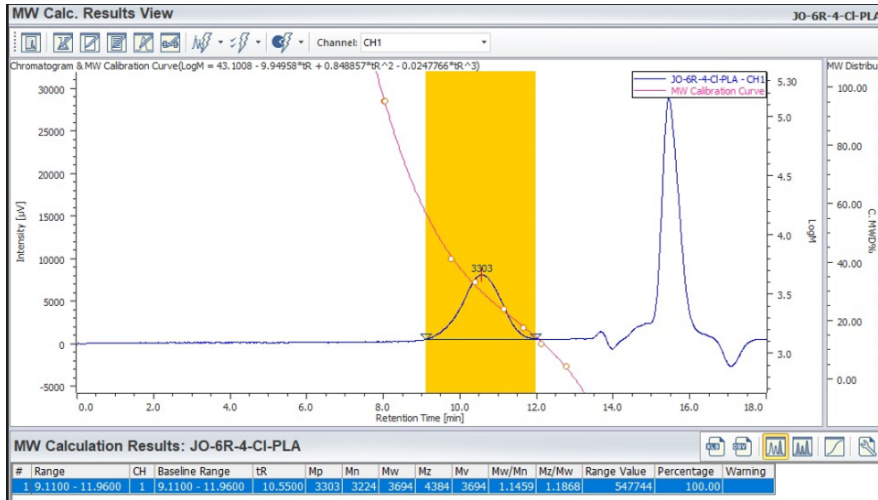

Figure S41. GPC spectrum of PLA (entry 6 of Table 2)

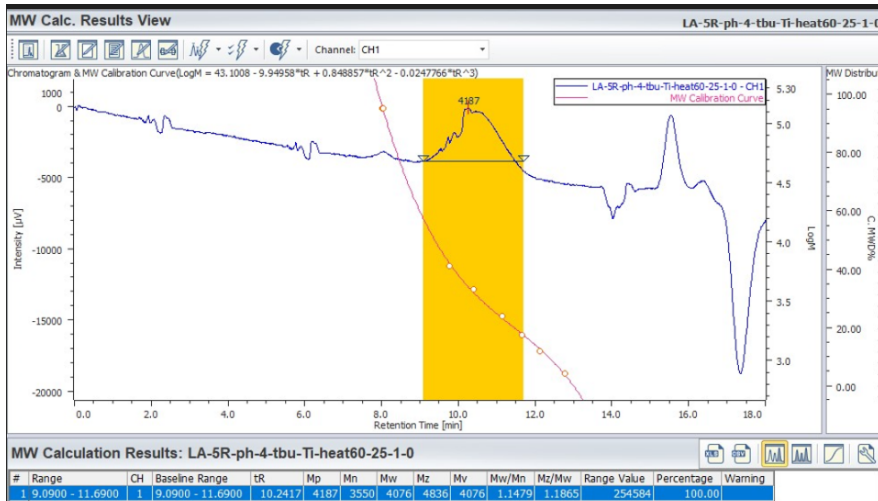

Figure S42. GPC spectrum of PLA (entry 7 of Table 2)

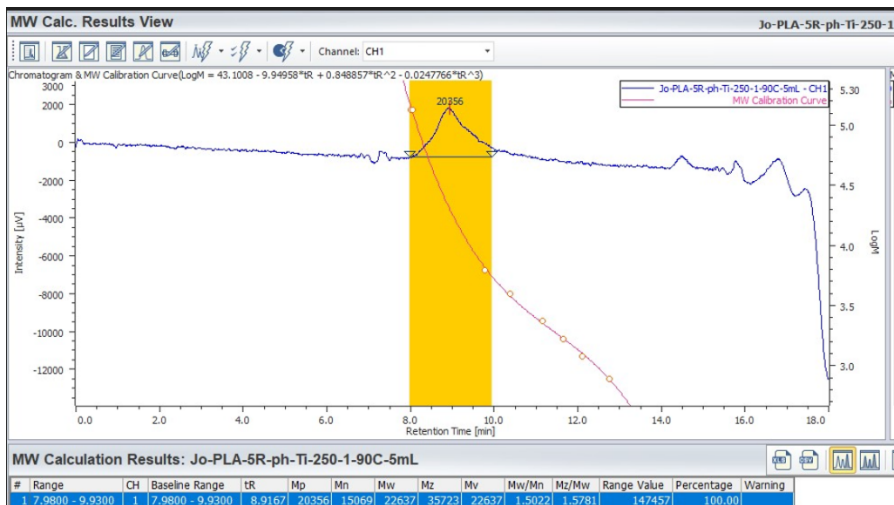

Figure S43. GPC spectrum of PLA (entry 8 of Table 2)

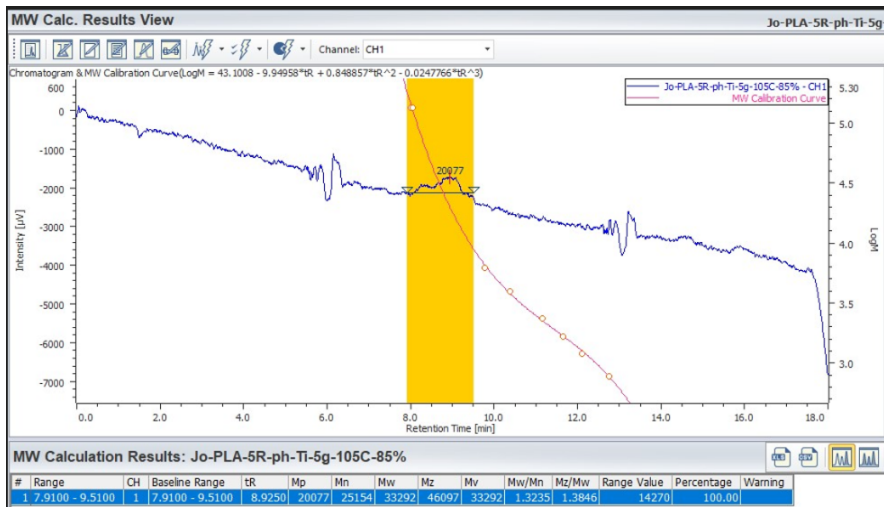

Figure S44. GPC spectrum of PLA (entry 9 of Table 2)

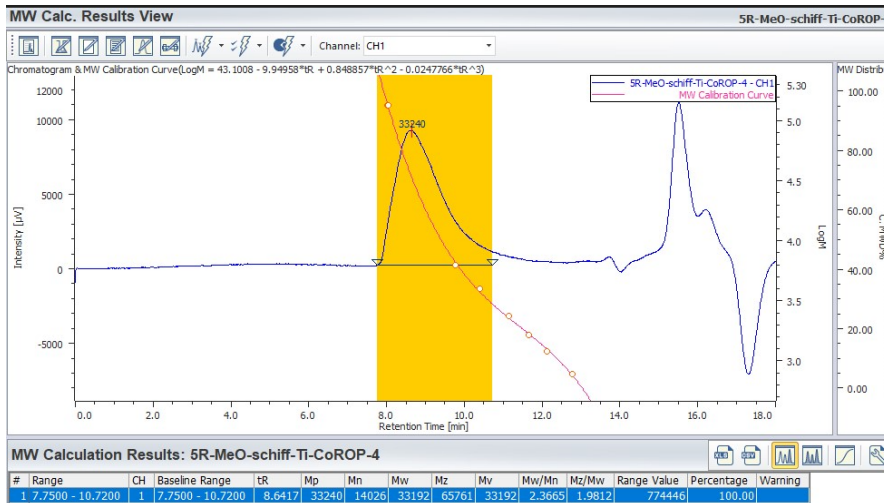

Figure S45. GPC spectrum of PLA (entry 4 of Table 3)

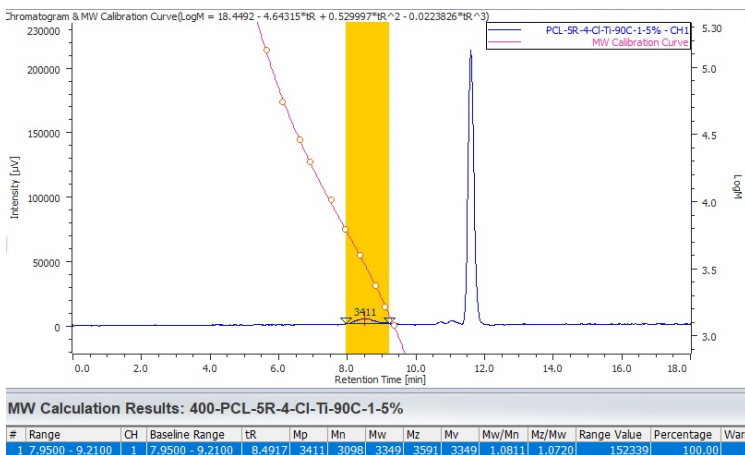

Figure S46. GPC spectrum of PCL (entry 1 of Table S8)

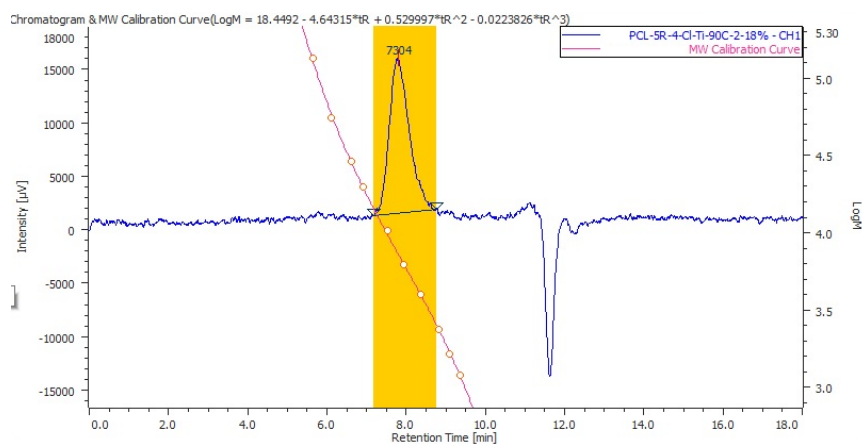

**MW Calculation Results: 400-PCL-5R-4-CI-Ti-90C-2-18%**

| # | Range           | CH | Baseline Range  | tR     | Mp   | Mn   | Mw   | Mz   | Mv   | Mw/Mn  | Mz/Mw  | Range Value | Percentage | Warn |
|---|-----------------|----|-----------------|--------|------|------|------|------|------|--------|--------|-------------|------------|------|
| 1 | 7.1600 - 8.7600 | 1  | 7.1600 - 8.7600 | 7.7833 | 7304 | 6600 | 7092 | 7569 | 7092 | 1.0746 | 1.0672 | 507353      | 100.00     |      |

**Figure S47.** GPC spectrum of PCL (entry 2 of Table S8)

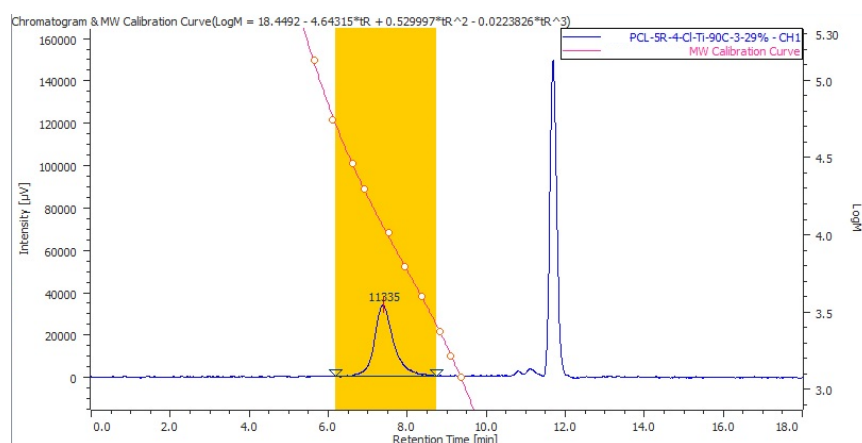

**MW Calculation Results: 400-PCL-5R-4-CI-Ti-90C-3-29%**

| # | Range           | CH | Baseline Range  | tR     | Mp    | Mn    | Mw    | Mz    | Mv    | Mw/Mn  | Mz/Mw  | Range Value | Percentage | Warn |
|---|-----------------|----|-----------------|--------|-------|-------|-------|-------|-------|--------|--------|-------------|------------|------|
| 1 | 6.1770 - 8.7200 | 1  | 6.1700 - 8.7200 | 7.3750 | 11335 | 10069 | 11128 | 12199 | 11128 | 1.1052 | 1.0962 | 1126596     | 100.00     |      |

**Figure S48.** GPC spectrum of PCL (entry 3 of Table S8)

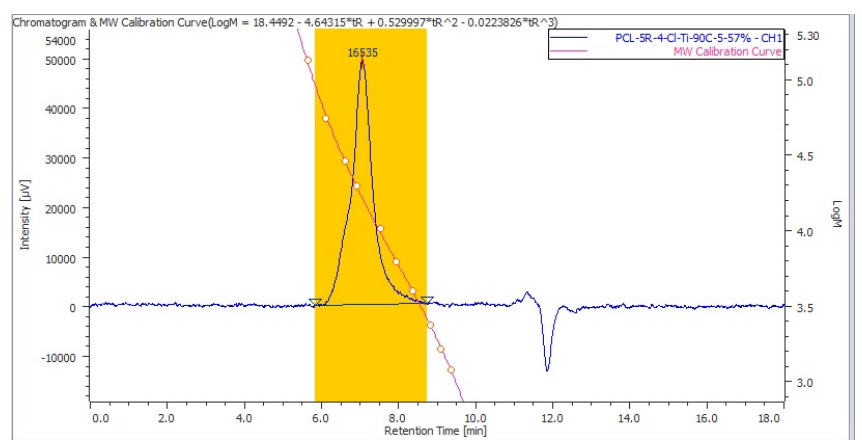

**MW Calculation Results: 400-PCL-5R-4-CI-Ti-90C-5-57%**

| # | Range           | CH | Baseline Range  | tR     | Mp    | Mn    | Mw    | Mz    | Mv    | Mw/Mn  | Mz/Mw  | Range Value | Percentage | Warn |
|---|-----------------|----|-----------------|--------|-------|-------|-------|-------|-------|--------|--------|-------------|------------|------|
| 1 | 5.8400 - 8.7200 | 1  | 5.8400 - 8.7200 | 7.0417 | 16535 | 14858 | 17879 | 21238 | 17879 | 1.2033 | 1.1879 | 1977044     | 100.00     |      |

**Figure S49.** GPC spectrum of PCL (entry 4 of Table S8)

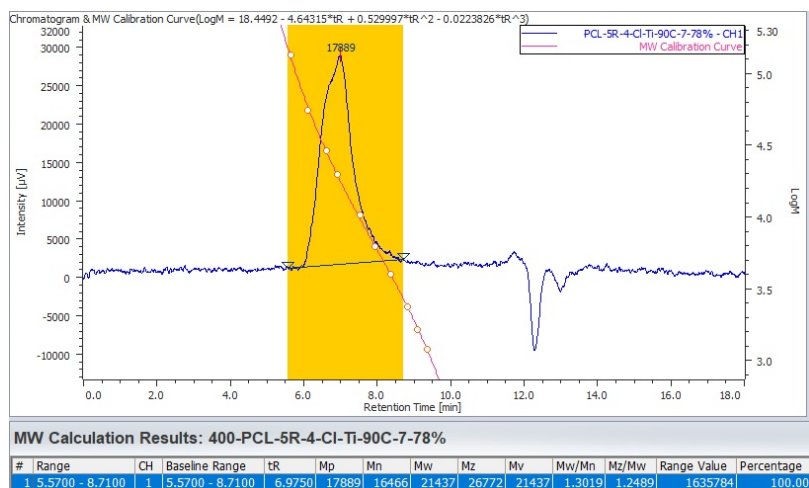

Figure S50. GPC spectrum of PCL (entry 5 of Table S8)

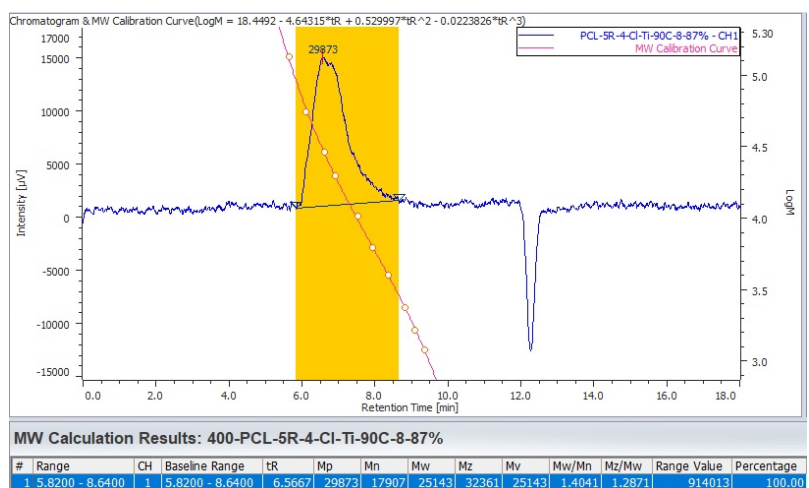

Figure S51. GPC spectrum of PCL (entry 6 of Table S8)

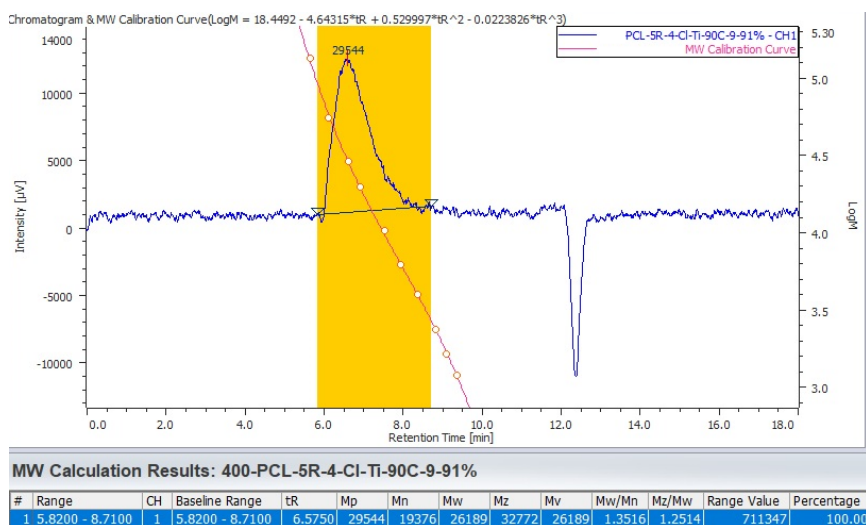

Figure S52. GPC spectrum of PCL (entry 7 of Table S8)



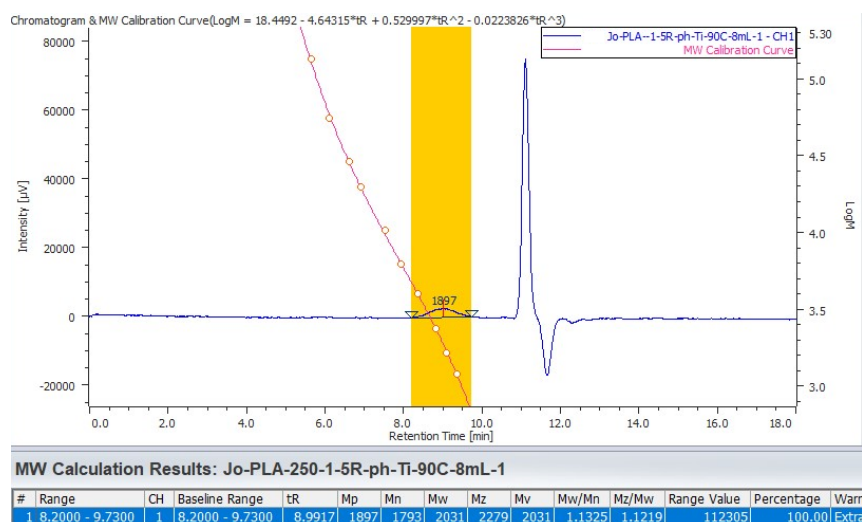

Figure S53. GPC spectrum of PLA (entry 1 of Table S9)

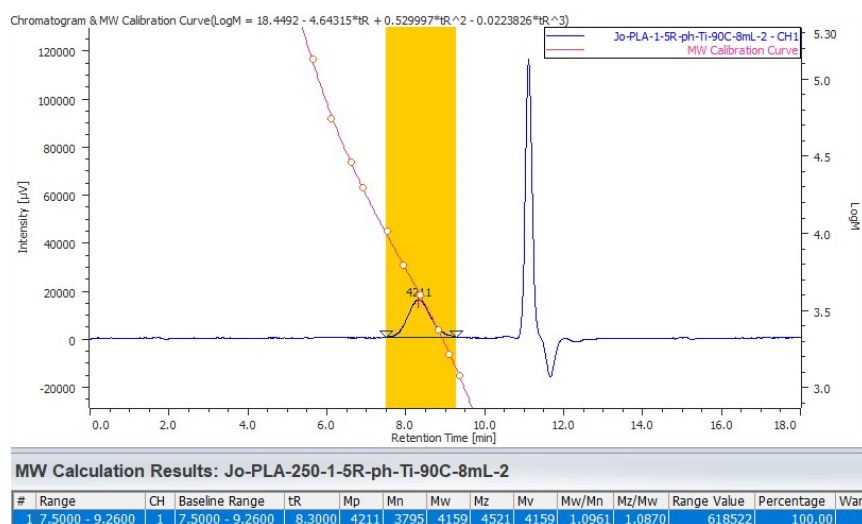

Figure S54. GPC spectrum of PLA (entry 2 of Table S9)

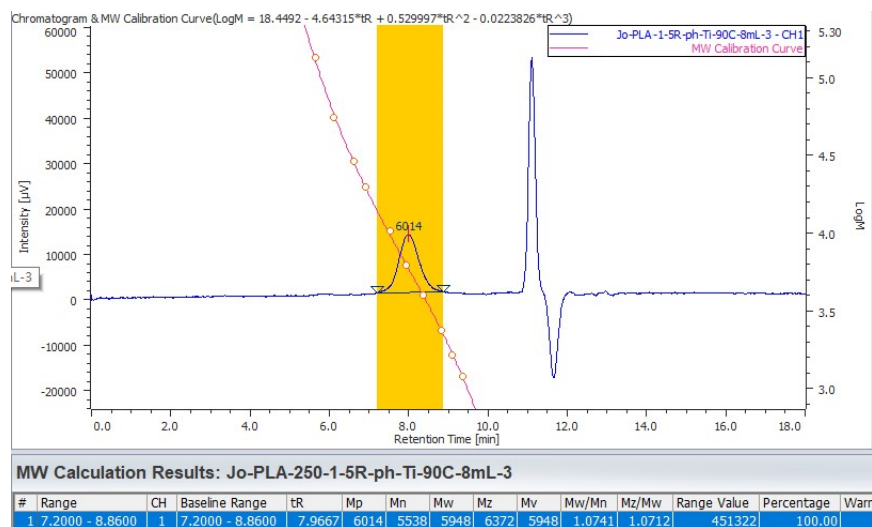

Figure S55. GPC spectrum of PLA (entry 3 of Table S9)

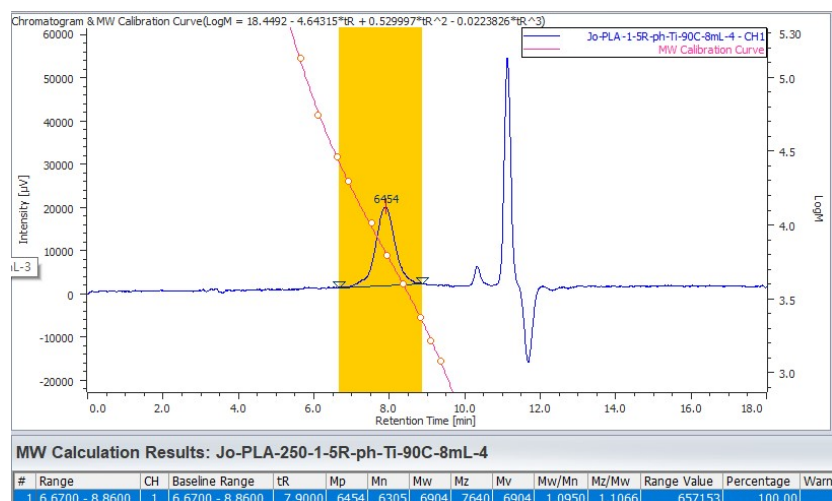

Figure S56. GPC spectrum of PLA (entry 4 of Table S9)

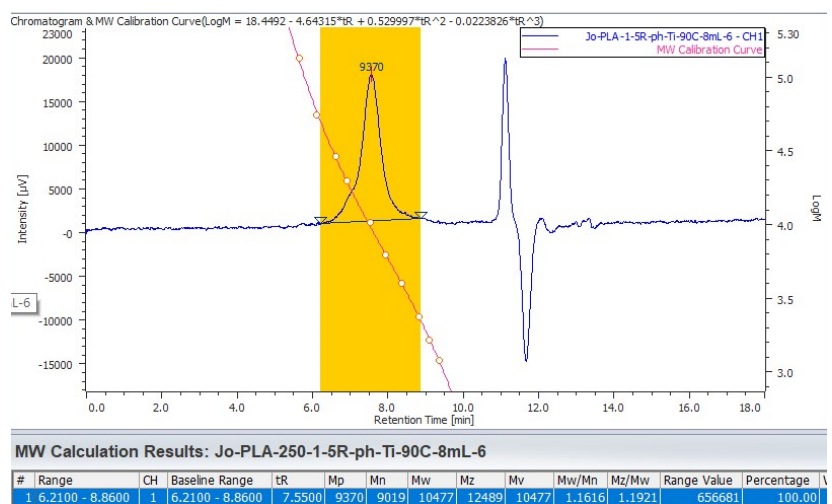

Figure S57. GPC spectrum of PLA (entry 5 of Table S9)

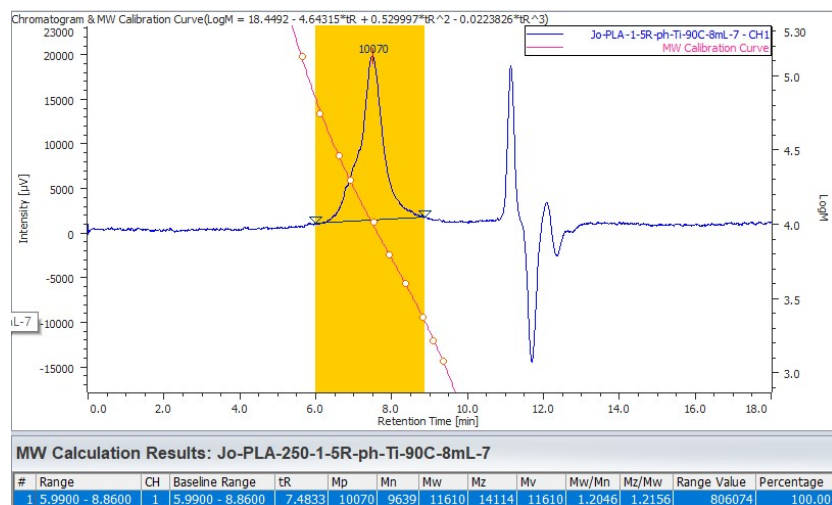

Figure S58. GPC spectrum of PLA (entry 6 of Table S9)

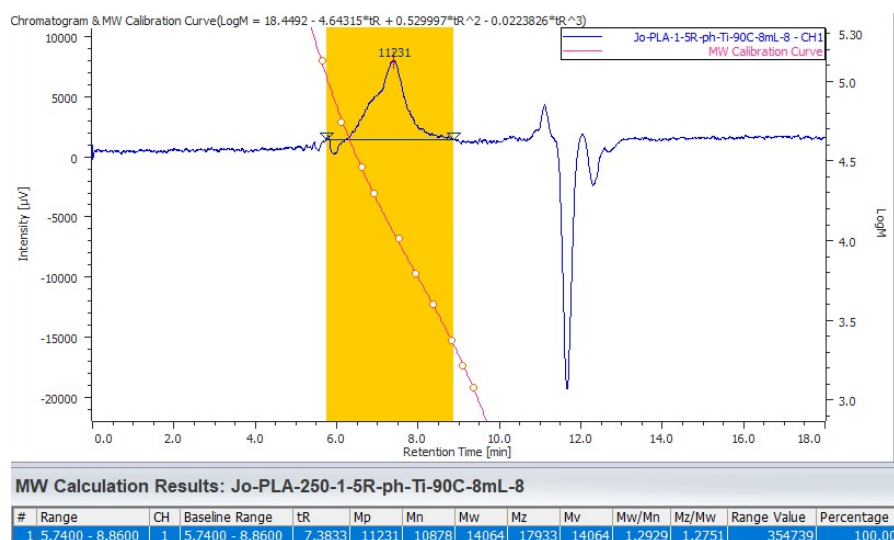

**Figure S59.** GPC spectrum of PLA (entry 7 of Table S9)

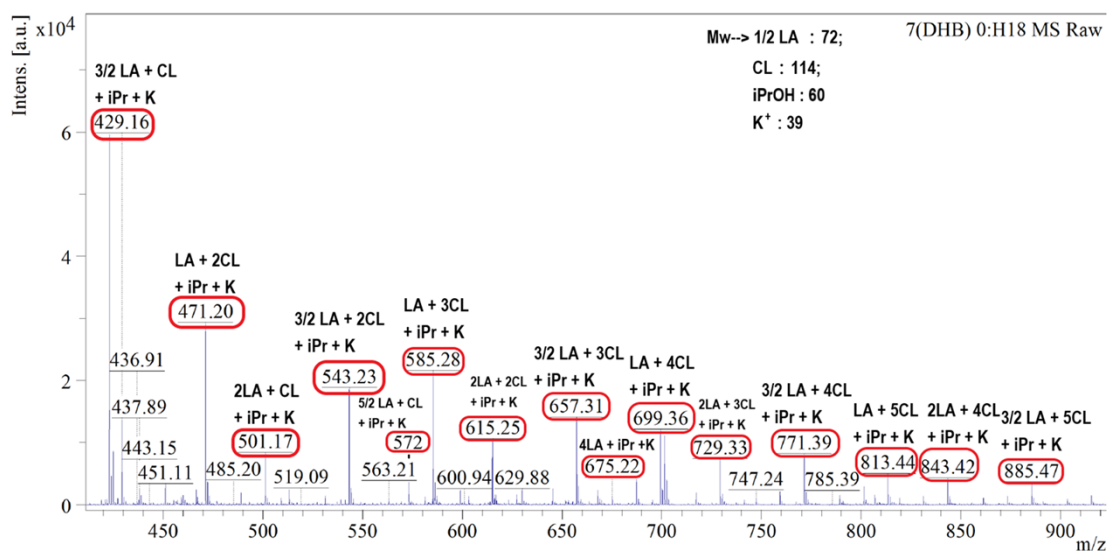

**Figure S60.** MALDI-TOF spectra of PLA-*grad*-PCL copolymer (50 CL + 50 LA) using **F<sup>OMe</sup>-Ti** as a catalyst; PLA conversion = 19% and PCL conversion = 2% (matrix: DCTB; ionization salt: KI; solvent: CH<sub>2</sub>Cl<sub>2</sub>).



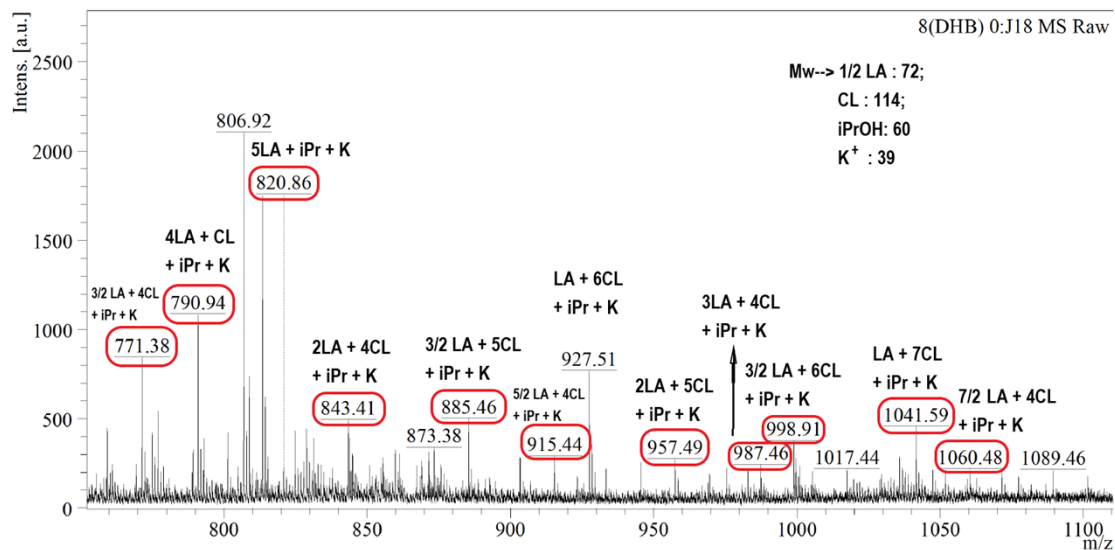

**Figure S61.** MALDI-TOF spectra of PLA-*grad*-PCL copolymer (50 CL + 50 LA) using **FOMe-Ti** as a catalyst; PLA conversion = 37% and PCL conversion = 10% (matrix: DCTB; ionization salt: KI; solvent: CH<sub>2</sub>Cl<sub>2</sub>).

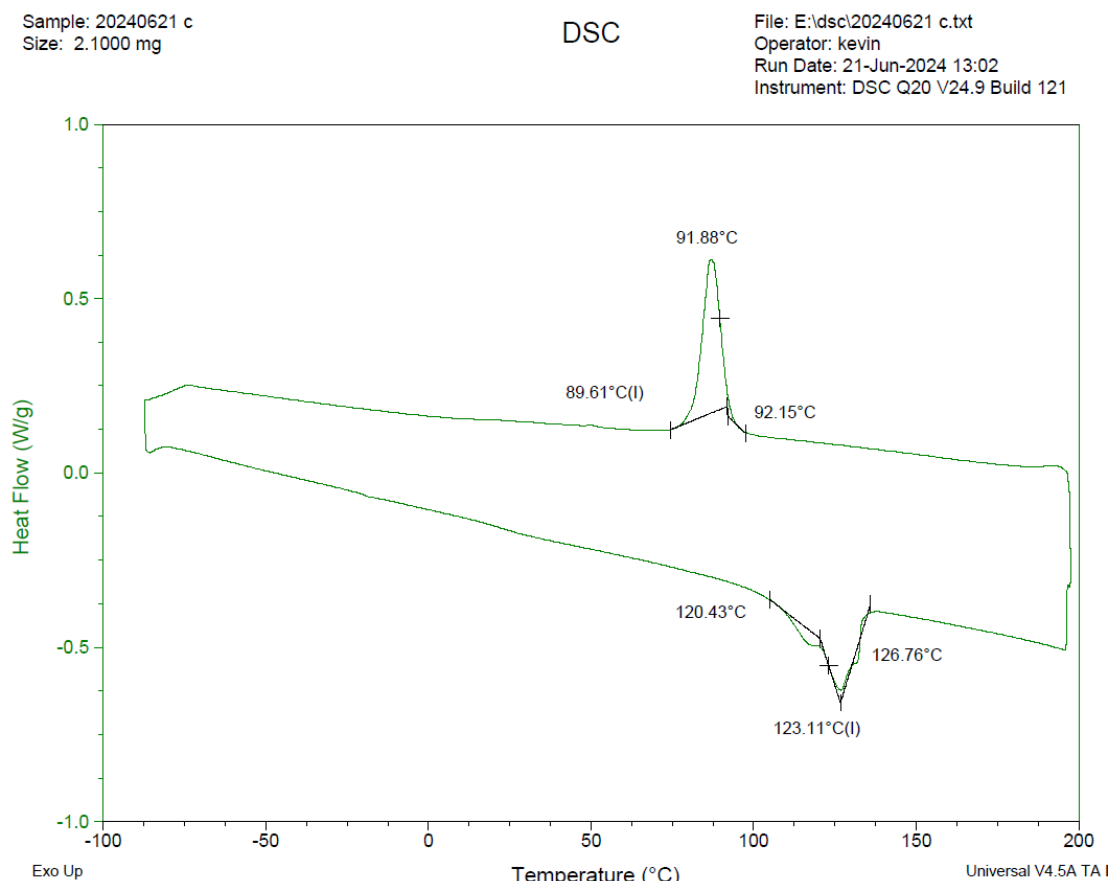

**Figure S62.** DSC curve of PLA (entry 3 of Table 3)

Sample: 20240730 D  
Size: 1.4000 mg

### DSC

File: E:\dsc\20240730 D.txt  
Operator: kevin  
Run Date: 30-Jul-2024 13:27  
Instrument: DSC Q20 V24.9 Build 121

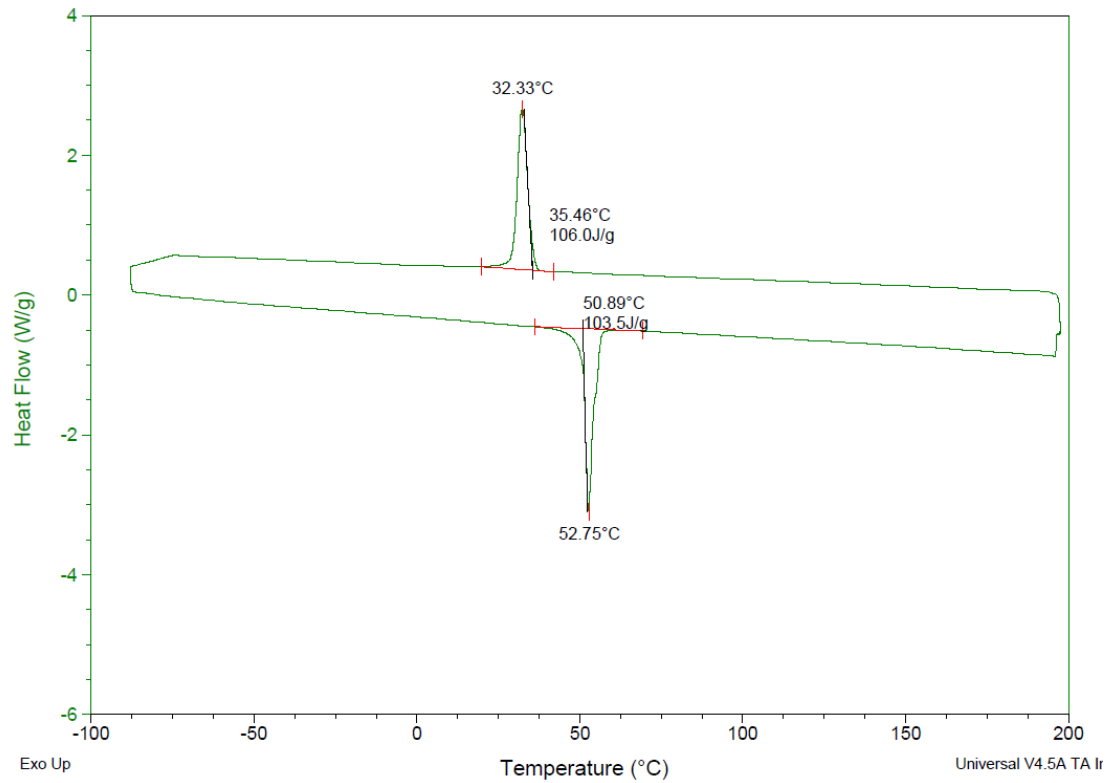

**Figure S63.** DSC curve of PCL (entry 3 of Table 2)

Sample: 20240802 A  
Size: 1.0200 mg

DSC

File: E:\dsc\20240802 A.txt  
Operator: kevin  
Run Date: 02-Aug-2024 13:33  
Instrument: DSC Q20 V24.9 Build 121

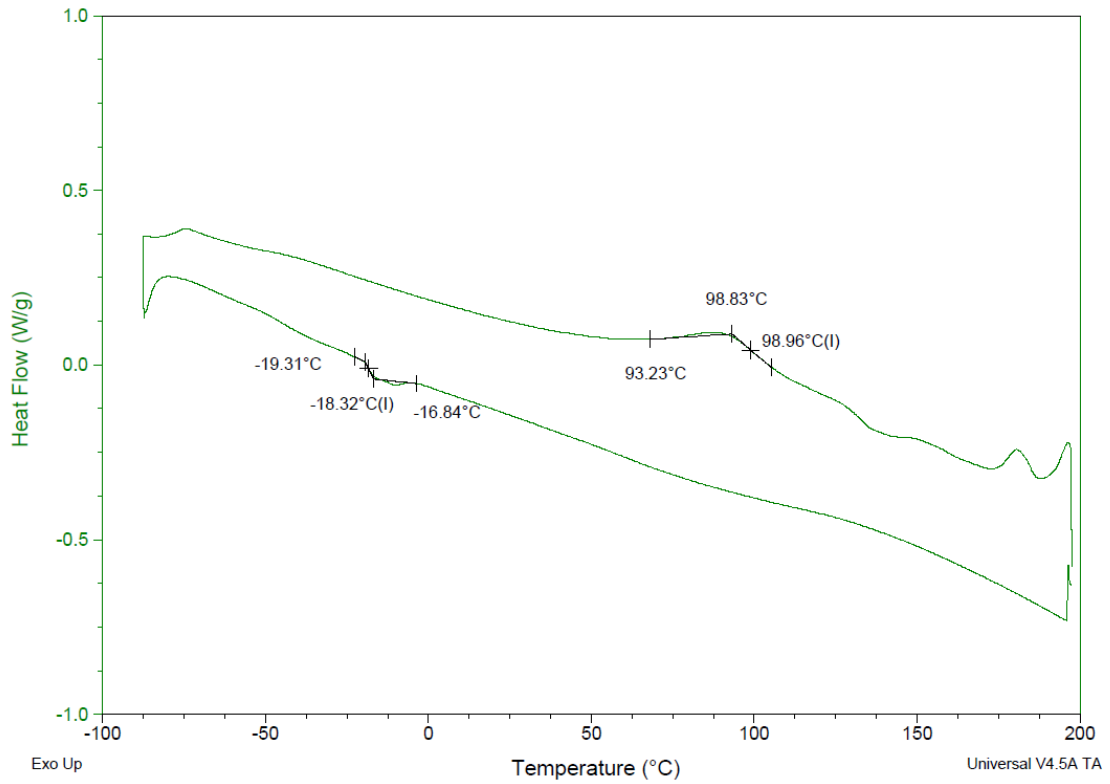

Figure S64. DSC curve of PLA-grad-PCL (entry 8 of Table 4)
